# Supplementary material
Source: PubMed Central journal article supplement (PMC3910952)

**Evolution of the Cytosolic Iron/Sulfur cluster Assembly machinery in *Blastocystis* sp. and other microbial eukaryotes**

Anastasios D. Tsaousis, Eleni Gentekaki, Laura Eme, Daniel Gaston & Andrew J. Roger

**Supplementary materials list:**

1. Supplementary figure legends
2. Supplementary References
3. Figure S1
4. Figure S2
5. Figure S3
6. Figure S4
7. Figure S5
8. Figure S6
9. Figure S7
10. Figure S8
11. Figure S9
12. Figure S10
13. Figure S11
14. Figure S12
15. Figure S13
16. Figure S14
17. Figure S15
18. Table S1

## Supplementary figure legends:

### Figure S1:

**Schematic model of the CIA pathway in opisthokonts.** Dre2 along with the diflavin reductase Tah18, form an electron transfer chain with the use of NADPH for Tah18-dependent reduction of one of the two Fe/S clusters of Dre2. The nuclear binding proteins Nbp35 and Cfd1 form a scaffold complex responsible for assembling of transient bound Fe/S cluster in an early step of the biosynthetic process. In a later stage the Fe/S clusters are transferred to apo-proteins via Cia1 and Nar1 proteins. Lastly, MMS19 and Cia2 form a complex with Cia1 and Nar1 that facilitates the transfer of mature clusters to apo-proteins.

### Figure S2:

**Identification of functionally important structures in eukaryotic Cia1 sequences.** Sequence alignment of Cia1 protein sequences from microbial eukaryotes against the published structure of the yeast Cia1p (3). Cia1 are WD40 proteins that contain 28  $\beta$ -sheet structures highlighted in **green**. Potential helices are highlighted in **pink**. We used the PSIPRED server (1) for the structure prediction of the different proteins.

### Figure S3:

**Conservation of functionally important residues in Nar1 sequences from microbial eukaryotes.** Sequence alignment of Nar1 protein sequences against orthologous proteins from microbial eukaryotes have demonstrated the presence of a ferredoxin-like domain

(highlighted in blue) along with conserved residues forming an H-cluster domain (highlighted in yellow). Cysteines (potentially involvement in Fe/S cluster binding) are marked in red.

**Figure S4:**

**Conservation of functionally important residues in Nbp35 and Cfd1 sequences from microbial eukaryotes.** Sequence alignment of Nbp35 and Cfd1 protein sequences against bacterial and eukaryotic orthologous proteins. The conserved N-terminal CX13CX2CX5C motif (2) found only in the Nbp35 eukaryotic homologues is highlighted in blue. The Mrp family signature is indicated in green, the conserved Walker A motif is highlighted in grey, whereas the C-terminal CPXC is highlighted in yellow. Cysteines (potentially involvement in Fe/S cluster binding) are marked in red. Cfd1 protein sequences are shaded in grey for comparison with the Nbp35 homologues.

**Figure S5:**

**Western blot analyses of the expression of *Blastocystis* IscS, Nar1, Nbp35, SufCB and Tah18.** Western blots demonstrating the cellular localization of the *Blastocystis* components of Fe/S cluster biosynthesis. The heterologous anti-yeast Nbp35, Nar1 and Tah18 antisera shows specific detection of *Blastocystis* Nbp35, Nar1 and Tah18 proteins with apparent relative molecular mass of 36 kDa, 83 kDa and 75 kDa respectively in the cytosolic fraction, but absent in the MRO fraction, that is consistent with the absence of this protein in the mitochondria. In the blot of Nbp35 protein, a double band appears, which could be a result of degradation of the protein. The full-sized western blots are

shown on the right panel. Noted that in the case of the Nbp35 protein, a second band is present in an apparent molecular weight of 72 kDa (indicated with “\*\*”) in the cytosolic fraction, which could be a result of dimerisation of the aforementioned protein. The *Blastocystis* SufCB antiserum shows specific detection of *Blastocystis* SufCB with an apparent relative molecular mass of 77 kDa in the cytosolic fraction as well (positive control). The heterologous anti-*Trichomonas vaginalis* IscS antisera shows specific detection of *Blastocystis* IscS (4) with an apparent relative mass of 47 kDa in the MRO fraction (MRO positive control).

**Figure S6:**

**Immunolocalization of Nbp35, Nar1 with MitoTracker in *Blastocystis* sp.**

**a.** Cellular localization of the Nbp35 and MitoTracker in *Blastocystis* cells. i. Rabbit anti-yeast Nbp35 antibody (1:200) detects *Blastocystis* Nbp35 protein. ii. Localization of MitoTracker staining. iii. Overlapping of the previous images showing the localization pattern of Nbp35 and no co-localization with MitoTracker iv. Differential interference contrast (DIC) image of the cells used for immunofluorescence. **b.** Cellular localization of the Nar1 and MitoTracker in *Blastocystis* cells. i. Rabbit anti-yeast Nar1 antibody (1:100) detects *Blastocystis* Nbp35 protein. Localization of MitoTracker staining. iii. Overlapping of the previous images showing the localization pattern of Nbp35 and no co-localization with MitoTracker iv. Differential interference contrast (DIC) image of the cells used for immunofluorescence. Scale bar, 5  $\mu$ m.

**Figure S7:**

**Immunolocalization of Nbp35 in *Blastocystis*.** Image demonstrating the cytosolic localization of Nbp35 in *Blastocystis* cells by transmission electron microscopy. Inset is enlargement of specific regions of the cell, focusing in the localization of Nbp35 within the different compartments of the cell but also the distribution of the protein within the cytosol.

**Figure S8:**

**Immunolocalization of Nar1 in *Blastocystis*.** Image demonstrating the cytosolic localization of Nar1 in *Blastocystis* cells by transmission electron microscopy. Inset is enlargement of specific regions of the cell, focusing in the localization of Nar1 within the different compartments of the cell but also the distribution of the protein within the cytosol.

**Figure S9:**

**Immunolocalization of Tah18 in *Blastocystis*.** Image demonstrating the cytosolic localization of Tah18 in *Blastocystis* cells by transmission electron microscopy. Insets are enlargement of specific regions of the cell, focusing in the localization of Tah18 within the different compartments of the cell but also the distribution of the protein within the cytosol.

**Figure S10:**

**Identification of functionally important structures in eukaryotic Dre2 sequences.** Sequence alignment of Dre2 protein sequences from microbial eukaryotes demonstrating

the highly conserved C-terminus that contains two Fe/S cluster-binding motifs (CX<sub>2</sub>CXC and a CX<sub>2</sub>CX<sub>7</sub>CX<sub>2</sub>C in red), and the more divergent N-terminus with a methyltransferase domain.

**Figure S11:**

**Phylogeny of the cytosolic Fe/S cluster assembly protein Dre2.** The phylogenetic tree was inferred by Randomized Axelerated Maximum Likelihood (RAxML). A total of 78 taxa and 96 characters were used for the final phylogenetic analysis. Numerical values at the nodes represent branch support in the form of bootstrap (BP). Only bootstrap support values greater than 50 are shown.

**Figure S12:**

**Phylogeny of the cytosolic Fe/S cluster assembly proteins Nar1 and iron hydrogenase.** The iron hydrogenase protein sequences were used to root the tree. The phylogenetic tree was inferred by Randomized Axelerated Maximum Likelihood (RAxML). A total of 81 taxa and 233 characters were used for the final phylogenetic analysis. Numerical values at the nodes represent branch support in the form of bootstrap (BP). Only bootstrap support values greater than 50 are shown. Red line indicates the *Blastocystis* spp. homologues.

**Figure S13:**

**Phylogeny of the cytosolic Fe/S cluster assembly protein Cia1.** The phylogenetic tree was inferred by RAxML. A total of 59 taxa and 225 characters were used for the final

phylogenetic analysis. Numerical values at the nodes represent branch support in the form of bootstrap (BP). Only bootstrap support values greater than 50 are shown. Red line indicates the *Blastocystis* spp. homologues.

**Figure S14:**

**Phylogeny of the cytosolic Fe/S cluster assembly protein MMS19.** The phylogenetic tree was inferred by Randomized Axelerated Maximum Likelihood (RAxML). A total of 85 taxa and 53 characters were used for the final phylogenetic analysis. Numerical values at the nodes represent branch support in the form of bootstrap (BP). Only bootstrap support values greater than 50 are shown. Red line indicates the *Blastocystis* spp. homologues.

**Figure S15:**

**Phylogeny of the cytosolic Fe/S cluster assembly protein Cia2.** The phylogenetic tree was inferred by Randomized Axelerated Maximum Likelihood (RAxML). A total of 60 taxa and 98 characters were used for the final phylogenetic analysis. Numerical values at the nodes represent branch support in the form of bootstrap (BP). Only bootstrap support values greater than 50 are shown. The groups of the putative Cia2A and Cia2B are indicated. The *Homo sapiens* sequences are depicted in red and are the only Cia2A and Cia2B proteins that have been characterized to date.

**Table S1**

Distribution of homologues of the CIA machinery among publicly available genomes or expressed sequence tag data from eukaryote taxa. Table includes the accession numbers for all proteins reported in this manuscript.

### **Supplementary References:**

1. **McGuffin, L. J., K. Bryson, and D. T. Jones.** 2000. The PSIPRED protein structure prediction server. *Bioinformatics* **16**:404-405.
2. **Netz, D. J., A. J. Pierik, M. Stumpfig, E. Bill, A. K. Sharma, L. J. Pallesen, W. E. Walden, and R. Lill.** 2012. A bridging [4Fe-4S] cluster and nucleotide binding are essential for function of the Cfd1-Nbp35 complex as a scaffold in iron-sulfur protein maturation. *J Biol Chem* **287**:12365-12378.
3. **Srinivasan, V., D. J. Netz, H. Webert, J. Mascarenhas, A. J. Pierik, H. Michel, and R. Lill.** 2007. Structure of the yeast WD40 domain protein Cia1, a component acting late in iron-sulfur protein biogenesis. *Structure* **15**:1246-1257.
4. **Tsaousis, A. D., S. Ollagnier de Choudens, E. Gentekaki, S. Long, D. Gaston, A. Stechmann, D. Vinella, B. Py, M. Fontecave, F. Barras, J. Lukes, and A. J. Roger.** 2012. Evolution of Fe/S cluster biogenesis in the anaerobic parasite *Blastocystis*. *Proc Natl Acad Sci U S A* **109**:10426-10431.



Figure S1

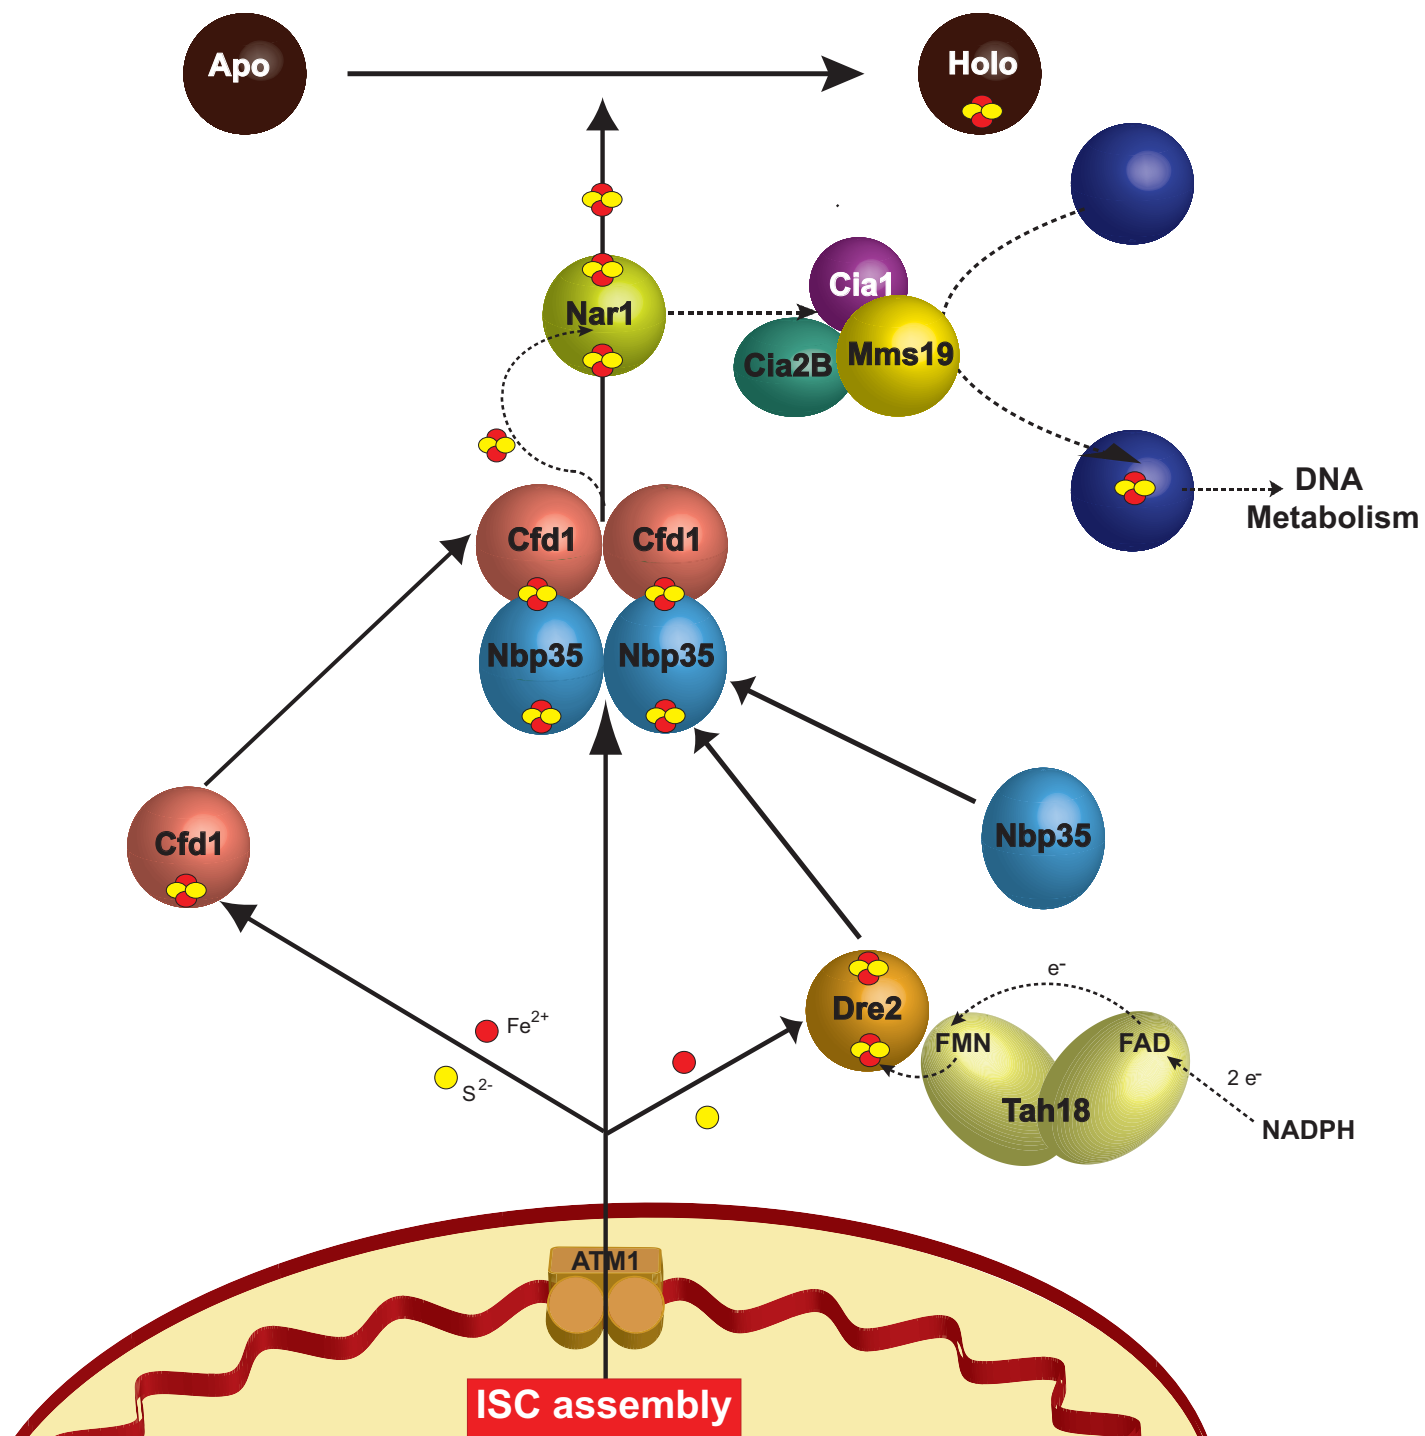

Figure S2

|                        |                                       |           |         |          |         |           |         |        |           |        |           |        |          |          |
|------------------------|---------------------------------------|-----------|---------|----------|---------|-----------|---------|--------|-----------|--------|-----------|--------|----------|----------|
| <i>Homo</i>            | -----MKDS                             | <b>β1</b> | LVLGRV  | ----     | PAHPDSR | <b>β2</b> | CWFLAW  | NPAGT  | <b>β3</b> | LLASC  | <b>β4</b> | GDRR   | IRIWGT   | -----EG  |
| <i>Saccharomyces</i>   | -----MASI                             | NLIKSL    | ----    | KLY      | ----    | KEKI      | WSFDF   | SQG    | ----      | ILATG  | ----      | SDRK   | IKLVSV   | YDD----- |
| <i>Blastocystis S1</i> | -----MPS                              | VRLSSF    | ----    | KAH      | ----    | EGVA      | WYVSW   | SPDGN  | ----      | ELLTC  | ----      | SDRS   | VKLWGR   | -----MG  |
| <i>Blastocystis S7</i> | -----MSRI                             | TLLSSE    | ----    | QAH      | ----    | DSRA      | WYSSW   | SPDGN  | ----      | EILTC  | ----      | GADKS  | VKIWGR   | -----MG  |
| <i>Phytophthora</i>    | -----                                 | MGV       | ----    | RRH      | ----    |           |         |        | ----      |        | ----      |        |          | -----    |
| <i>Phaeodactylum</i>   | -----                                 |           | ----    |          | ----    | EP        | AWQVAF  | SRDGR  | ----      | YLAVCY | GAIEP     | CVRIWQ | QSSPFH   | -----ED  |
| <i>Arabidopsis</i>     | -----                                 | MKVM      | KNLGL   | EEVQKI   | ----    | EGH       | ----    | TDR    | VWVAV     | NPAADG | VIASC     | ----   | SADKT    | VRIWEQSS |
| <i>Micromonas</i>      | MLSFLGRGKPSDPPPEPSPAPDPPPASSAPPPSAPPD | FSDAKAVT  | IELVAEL | ----     | EGH     | DDR       | VWGMQ   | EPRGR  | ----      | CLAST  | ----      | SSDKT  | CRLWSQSA | -----AG  |
| <i>Cyanidioschyzon</i> | -----                                 |           | ----    |          | ----    | MQW       | EWLRVDV | ----   | ----      | ORE    | ----      | HET    | LWCATW   | SPNGQ    |
| <i>Dictyostelium</i>   | -----                                 | MTDT      | TKNDKYN | LKLIDSMQ | KEAP    | ----      | YDK     | VWNLAW | HPNGE     | ----   | ILATC     | ----   | ANDKY    | IQIWSKD  |
| <i>Plasmodium</i>      | -----                                 | MT        | VEFVVNL | ----     | ENH     | ----      | KRR     | IWSICW | SPDGN     | ----   | FLASV     | ----   | GADKY    | ITIWV    |
| <i>Cryptosporidium</i> | -----                                 | MGSL      | DKLGI   | ----     | GVL     | ----      | DSA     | IWSVAS | HPKDR     | ----   | IIASC     | ----   | GS       | ----     |
| <i>Tetrahymena</i>     | -----                                 | MIEEK     | MEEQKE  | FVKCIGOL | ----    | NGH       | ----    | TDK    | IWSVSW    | HPTLD  | ----      | IFATC  | ----     | SDKT     |
| <i>Naegleria</i>       | -----                                 | MT        | NDL     | LAALT    | TOE     | ISAVE     | GNV     | ----   | SDH       | ----   | EES       | VWSIAW | HPKYSN   | LLATC    |
| <i>Drosophila</i>      | -----                                 | MGR       | ----    | LLEHTL   | ----    | GGH       | ----    | KGR    | IWGVAV    | HPKGN  | ----      | VFASC  | ----     | EDKA     |
| <i>Giardia</i>         | -----                                 | MV        | NDRV    | SLLNHT   | ----    | AAH       | ----    | TD     | IWR       | LRA    | SHTGE     | ----   | LVASC    | ----     |
| <i>Trypanosoma</i>     | MLSS                                  | YFSWME    | DVDAR   | VLRAGG   | SDNH    | MRPLY     | LPEAP   | LLRV   | EPVCTL    | ----   | ----      | ----   | RDH      | ----     |
| <i>Entamoeba</i>       | -----                                 |           | ----    |          | ----    | MQL       | ----    | VDSF   | ----      | ----   | ----      | ----   | ----     | ----     |
| <i>Encephalitozoon</i> | -----                                 |           | ----    |          | ----    | MK        | ----    | YRITS  | ----      | KKLGE  | ----      | KILAV  | ----     | HAGK     |

|                        |       |      |          |        |        |        |        |         |        |        |      |         |             |         |      |      |        |        |       |
|------------------------|-------|------|----------|--------|--------|--------|--------|---------|--------|--------|------|---------|-------------|---------|------|------|--------|--------|-------|
| <i>Homo</i>            | DS    | ---- | WICKSVL  | S-E-GH | QRT    | VRKVAW | S-P-CG | NYLASAS | FDAT   | TCI    | WKK  | KNQD    | ----        | DF      | ECV  | TTL  | EGHENE | -----  |       |
| <i>Saccharomyces</i>   | DS    | ---- | FTLIDVLD | ETAH   | KKA    | IRSVAV | R-P-HT | SLLAAGS | FDS    | TVS    | IWA  | KEESADR | ----        | TF      | EMD  | LLAI | EGHENE | -----  |       |
| <i>Blastocystis S1</i> | DS    | ---- | WAVIETH  | D-G-IH | KKT    | IRSCMS | P-DG   | NYIAAAS | FDS    | NSI    | VYH  | KTDG    | ----        | EW      | TF   | TML  | EGHVNE | -----  |       |
| <i>Blastocystis S7</i> | DS    | ---- | WVLKETL  | D-G-LH | SKS    | IRSCMS | P-DG   | KYIAAAS | FDS    | NSI    | VYR  | XENE    | ----        | EW      | KL   | TML  | EGHVNE | -----  |       |
| <i>Phytophthora</i>    | DS    | ---- |          | ----   |        | SRGR   | TD     | PHHPSL  | S-P-DG | RYLASV | FDGT | TVI     | WEKQGS      | ----    | SY   | EVI  | SSL    | EGHESE | ----- |
| <i>Phaeodactylum</i>   | SG    | ---- | WILDATL  | T-G-IQ | TRT    | IRSI   | AFA    | PIRTP   | LLASAS | FDGT   | VAV  | WEHY    | PATNGALV    | TASAK   | SPSG | ---- | VDE    | WE     | CTAQL |
| <i>Arabidopsis</i>     | SG    | ---- |          | ----   |        | TR     | ----   | SWT     | ----   | CKLGH  | RLGS | FDGNT   | TCV         | WEN     | FAT  | ---- | DSE    | VS     | VL    |
| <i>Micromonas</i>      | GN    | ---- | WVTVAEL  | E-G-VH | NRT    | VRQVSW | S-P-CG | RLATAS  | FDAS   | TAV    | WT   | QSGG    | ----        | D       | WE   | CV   | AVV    | EGHENE | ----- |
| <i>Cyanidioschyzon</i> | GN    | ---- | GLLLGGLG | GD     | FARS   | VRRIDW | S-P-CG | LALAC   | FDSK   | VRVY   | RLV  | EGVSG   | GNGLSL      | EREPANA | ---- | VLA  | AYL    | REL    | VATL  |
| <i>Dictyostelium</i>   | GK    | ---- | WGLVOSLE | ----   | GHEKT  | VRRVAV | S-P-CG | RFLAGAS | FDAS   | TSI    | WEK  | SKD     | ----        | EL      | FT   | HV   | SSL    | EGHYE  | ----- |
| <i>Plasmodium</i>      | AGSIE | FDVY | DI       | E-T-N  | HEKS   | LRHIEF | S-R-DG | SFFVVAS | FDSK   | CS     | IYK  | KNNN    | ----        | D       | KV   | FY   | KSL    | EGHEKE | ----- |
| <i>Cryptosporidium</i> | NS    | ---- | WVKAYEFG | SLE    | HKRL   | IRKIAW | S-P-CG | GMI     | ISAS   | FDSS   | ISV  | WEFVSR  | ----        | D       | IG   | W    | AC     | ICKI   |       |
| <i>Tetrahymena</i>     | NQ    | ---- | YELKQTS  | D-TH   | ERT    | IRTLAF | S-P-DG | M       | LACGS  | FDST   | ISI  | YANNG   | ----        | S       | FE   | FV   | SKL    | EGHEHE |       |
| <i>Naegleria</i>       | SGR   | LF   | AKCIDVLE | N-QH   | NRT    | IRRV   | SLP--  | SGNAL   | LACAS  | FDGT   | SSI  | WILLQ   | NHLQALEEESQ | NSKES   | SPTT | SANL | GLLKCV | STL    |       |
| <i>Drosophila</i>      | NT    | ---- | WSTKTI   | S-D-GH | KRT    | IREIRW | S-P-CG | QY      | LASAS  | FDAT   | TAI  | WSK     | SSG         | ----    | E    | FE   | C      | NATL   |       |
| <i>Giardia</i>         | ----  |      | LHLVQRT  | RP     | GYDPVT | VRDCAF | S-A-ND | Q       | HLVAA  | YDGS   | I    | YVD     | DLINEL      | TQ      | ---- | ND   | PF     | OL     |       |
| <i>Trypanosoma</i>     | GT    | ---- | WSCIYTL  | E-G-EH | SRT    | VRHVSW | S-P-SG | T       | FI     | AC     | SDRT | ASV     | WR          | RASD    | ---- | DP   | NC     | F      |       |
| <i>Entamoeba</i>       | ----  |      | LKPL     | T-PH   | NRT    | IRR    | VKS    | S-K-NG  | LL     | AC     | SDST | VSL     | WEL         | NEN     | ---- | TI   | I      | G      |       |
| <i>Encephalitozoon</i> | ----  |      | LVNQDTG  | EV     | MCR    | CKKS   | VR     | SLA     | ----   | S-HGR  | Y    | VCCGS   | YDCT        | AVL     | ---- | DG   | K      | V      |       |

|                        |      |    |      |      |      |   |    |       |      |      |     |      |      |      |
|------------------------|------|----|------|------|------|---|----|-------|------|------|-----|------|------|------|
| <i>Homo</i>            | ---- | VK | SVAV | APSG | ---- | N | LL | ATCS  | RDKS | VW   | WEV | ---- | DEE  | ---- |
| <i>Saccharomyces</i>   | ---- | VK | GVAV | SN   | ---- | Y | LL | ATCS  | RDKS | VW   | I   | WE   | ---- | DE   |
| <i>Blastocystis S1</i> | ---- | VK | NVCW | SHDS | ---- | Q | L  | LASTS | SR   | ---- |     | ---- |      |      |
| <i>Blastocystis S7</i> | ---- | VK | NVCW | SRDG | ---- | K | L  | ASCS  | RD   | RNI  | I   | V    | ---- | NEE  |
| <i>Phytophthora</i>    | ---- | VK | SVAV | SPSG | ---- | S | Y  | L     | ATCS | RDKS | VW  | I    | WEA  | ---- |
| <i>Phaeodactylum</i>   | ---- | VK | C    | VQ   | ---- | S | L  | ASCS  | RD   | KT   | VW  | I    | WE   | ---- |
| <i>Arabidopsis</i>     | ---- | VK | SV   | W    | ---- | S | L  | ATC   | GR   | D    | K   | S    | VW   | ---- |
| <i>Micromonas</i>      | ---- | VK | SC   | AW   | ---- | T | L  | ATC   | GR   | D    | K   | S    | VW   | ---- |
| <i>Cyanidioschyzon</i> | ---- | VK | A    | AV   | ---- | T | L  | ATC   | AR   | D    | K   | T    | VW   | ---- |
| <i>Dictyostelium</i>   | ---- | VK | SV   | AW   | ---- | T | L  | ATCS  | RDKS | I    | W   | I    | W    | ---- |
| <i>Plasmodium</i>      | ---- | VK | C    | AS   | ---- | K | Y  | I     | V    | T    | C   | GR   | D    | S    |

|  |      |   |   |   |   |   |   |    |   |   |   |   |   |   |   |   |   |   |   |   |   |   |   |   |   |   |   |   |   |   |   |   |   |   |   |   |   |   |   |   |   |   |   |   |   |   |   |   |   |   |   |   |   |   |   |   |   |   |   |   |   |   |   |   |   |   |   |   |   |   |   |   |   |   |   |   |   |   |   |   |   |   |   |   |   |   |
|--|------|---|---|---|---|---|---|----|---|---|---|---|---|---|---|---|---|---|---|---|---|---|---|---|---|---|---|---|---|---|---|---|---|---|---|---|---|---|---|---|---|---|---|---|---|---|---|---|---|---|---|---|---|---|---|---|---|---|---|---|---|---|---|---|---|---|---|---|---|---|---|---|---|---|---|---|---|---|---|---|---|---|---|---|---|---|
|  | ---- | K | Y | I | V | T | C | GR | D | S | I | W | I | H | A | K | T | E | E | V | S | R | K | E | D | D | Q | G | V | I | A | S | N | G | G | E | A | H | P | N | G | I | H | N | E | E | Q | T | K | E | S | Q | N | G | A | K | T | E | A | Q | C | G | N | P | G | E | T | H | P | N | A | E | P | Q | N | V | N | D | I | D | A | D | A | D | V | D |
|--|------|---|---|---|---|---|---|----|---|---|---|---|---|---|---|---|---|---|---|---|---|---|---|---|---|---|---|---|---|---|---|---|---|---|---|---|---|---|---|---|---|---|---|---|---|---|---|---|---|---|---|---|---|---|---|---|---|---|---|---|---|---|---|---|---|---|---|---|---|---|---|---|---|---|---|---|---|---|---|---|---|---|---|---|---|---|

*Cryptosporidium* ---VKCVDWSPFN-----N FVAACRDRAIWFFSLDIGENRKLG-----T  
*Tetrahymena* YKKVKCVAW DSEG-----KFLASC SRDKT VVVVDY-----ENG-----  
*Naegleria* ---VKSVAV NYKSASLMDQSDHDGEDGDCG LLATCG RDKT VVWWEA-----IDK-----VG  
*Drosophila* ---VKSVSW SRSG-----GLLATCS RDKS VVIWEV-----AGD-----  
*Giardia* ---IKSIDI SKEG-----TVATCS RDRF VSFWRP-----CSDS-----  
*Trypanosoma* ---VKCAAW GTDN-----TLATCS RDRT VVVWDR-----VDV-----  
*Entamoeba* ---VKCVDW SFGS-----NMVATCS RDK SVWLWKS-----YSG-----  
*Encephalitozoon* ---VKCVAF SEDG-----RYLAMAT RGRS VVVVKI-----D-----

β13 β14 β15 β16 β17 β18  
*Homo* -DE-----YECVSV LNSHTQD VKHVV-----WHP-----SQE LLASAS YDDT VKLYRE-----EEDD NVCCATLE-----GHEST VWSLAF DPS  
*Saccharomyces* -EE-----YECISV LQEHSDQ VKHVI-----WHP-----SEA LLASSS YDDT VRIWKD-----YDDD WECVAVLN-----GHEGT VWSSDF DKT  
*Blastocystis S1* -----  
*Blastocystis S7* -DDEMDSCSRD RCVSV LSGHTQD VKFVR-----FNP-----ANN NLYSCS YDD IIKVWLY-----D-GED FSNIKHA-----PHEGT VWGLAF NHR  
*Phytophthora* -TD-----FECISV LH AHMQD VKFVA-----WHP-----KED LLVSAS YDDT IRIWAE-----NDDD NYCKETLT-----GHTAT VWGVAL SPQ  
*Phaeodactylum* -GD-----FECIAV L HGHEGD VKCQVF TSSHDEWGD-----GDE ILLSSS YDNT IKCWAE-----DAGD NYCAASIED-----VHSST IWSLAM SPS  
*Arabidopsis* -DE-----FDTI AVL TGHSED VKMVL-----WHP-----TMD VLFSCS YDNT IKIWC S-----EDEDGD Y NCVQTLSEL-----NNGHSST VWSISFNAA  
*Micromonas* -ND-----FECVAV L NGHSDQ VKCVT-----WHP-----TED VLVSTS YDDT IKIWT E-----DPDGDW SCSKTL SKE-----DGGHEST VWCAST EPG  
*Cyanidioschyzon* -LD-----FECVAV LA GHTQD VKSLV-----WHP-----RTE LLASAS YDNT IRLWCE-----DVIDGE NYCCAVLS-----GHEST VWSVAF APT  
*Dictyostelium* -ND-----FECLSI N SGHGQD IKCVI-----WHP-----NEE LLASSS YDDT IKFWK D-----IDGD WECINTLT-----GHES IWDLAF NKD  
*Plasmodium* DFD-----FSFDAY L TAHSEDI KFVA-----WCPL-----SENTF I SLS YDNS LKIWSK-----QISEWNCIQTLN-----EHTSV WCVAF NFD  
*Cryptosporidium* PIE-----YDCIGV VTAHTND IKKIK-----WHPT-----IPMVL LSCS YDNT IIAWAPSSQLLGH-DEVKSLEWVKLYTLN-----GHSST VWDFTY SPN  
*Tetrahymena* -FD-----FSCYSV IDAHTQD VKHVK-----WIP-----GTNNLASTE FDD KKLWEQ-----EDDD NKCSATYS-----NHSAT WCVVEF SKT  
*Naegleria* FSD-----FDCNSV CSGHTQD VKFVA-----WHP LTRSNMPS LLYSAS YDNT IRIWKE--GGFEEDHDRQSDWKCVGILR-----GHTST VWGLAF EPQ  
*Drosophila* -DE-----FECAAV L NPHTQD VKRVV-----WHP-----TKD VLASAS YDNT IKMFAE-----EPIDNDW DCTATLT-----SHTST VWGIDF DAD  
*Giardia* -PD-----YDCIGLE NNHTEDI KCVR-----FNK-----NGNYLVSAS YDNNMCLYKRCIEMADELGEEIEES NVLVGATKSELDLNS CELNAPDSE ILLA SKSSCHT VVTAIF TAN  
*Trypanosoma* -GE-----FECAGV LAGHAQD VKACA-----WLFPSGGVEKP LLFSCS YDNT VKVWTE-----SHKRDD NYCHQTLT-----RHDGT VWSVAV QPI  
*Entamoeba* -ID-----YECDSV L TGHSGD VKTVL-----FHP-----SGT I LFSGS FDGT IKVVKG-----EETEWS ELOTLIQ-----AYGKT VWDLKIT KE  
*Encephalitozoon* -GE-----IEIDGV I EDHLHD VKGCI-----FHG-----GLLFTY G YDNT VKVYDR-----FDYDSS WELVQ SID-----ERST WCVVIF HNG

β19 β20  
*Homo* -G-----QRLA-----SCS DDRT VRIWRO Y-----  
*Saccharomyces* EG-----VFRLC-----SGS DDST VRVVK-----  
*Blastocystis S1* -----  
*Blastocystis S7* -G-----QVRL VVRL SCGM DGH VVLWK-----  
*Phytophthora* -G-----TEMA-----SVS DDTD VVIWQ-----  
*Phaeodactylum* -G-----LRMI-----SGS DDQS LGIYKCY-----  
*Arabidopsis* -G-----DKMV-----TCS DDLA VKIWKTD-----  
*Micromonas* -G-----AHRVV-----TCS DDRT IAVWN-----  
*Cyanidioschyzon* -A-DA-----GYEHLA-----SAGADGR LLLWQRC-----  
*Dictyostelium* -G-----DKLV-----SCG EDKL VLFWKFD-----  
*Plasmodium* -G-----SEFA-----TCS DDKS IRIWK SEKKI WYN KHKYPFL YQHIVKD ARKSSNESS LCSL INKSNGTLGGSAAATA VKQALA NDSRGYSNHNSKDSANGKGSNDR  
*Cryptosporidium* -G-----EFLI-----SCS DDSS IVLWNSN-----  
*Tetrahymena* -G-----QYMA-----SCG DDQK IKVYKKN-----  
*Naegleria* LSDDP-----EYPQ YMV-----SVG DDKS LILWRED-----  
*Drosophila* -G-----ERLV-----SCS DDTT IKIWKAY-----  
*Giardia* -G-----NSIL-----TVD GNGC VRCYSIV-----  
*Trypanosoma* EQPIDSLQMEEEER EGTALEYSPVVC-----CSS DDKT VTFWSRD-----  
*Entamoeba* -G-----KFIV-----AGCANGV ILYE-----  
*Encephalitozoon* -----RMV-----CTTEEGT VSIYALRS-----

*Homo*  
*Saccharomyces*

*Blastocystis* S1 -----  
*Blastocystis* S7 -----  
*Phytophthora* -----  
*Phaeodactylum* -----  
*Arabidopsis* -----  
*Micromonas* -----  
*Cyanidioschyzon* -----  
*Dictyostelium* -----  
*Plasmodium* NFLQKTTKLFKRKIREPMTQGGGDKTSDAPSNMP **ILDY**SKDD**KFVQAALKAVVQ**NNFVPLYFDHGL**FKFVYK**YADVEGAFQAQKGSTEKREEQGGHTEKESPNGAHPIEKNEPRNDECISK  
*Cryptosporidium* -----  
*Tetrahymena* -----  
*Naegleria* -----  
*Drosophila* -----  
*Giardia* -----  
*Trypanosoma* -----  
*Entamoeba* -----  
*Encephalitozoon* -----

*Homo* -----LPGNEQGVACSGSDP-----SW**KCICT**  
*Saccharomyces* **YMGDEDDQ**-----EW**VCEAI**  
*Blastocystis* S1 -----  
*Blastocystis* S7 -----  
*Phytophthora* -----YDSNSK**EV**NEDGGSK-----QW**KLKFT**  
*Phaeodactylum* -----TASEKRRHFPDEGKNRNG-----LW**KCVGH**  
*Arabidopsis* -----ISRMQSGEGYV-----PW**THVCT**  
*Micromonas* -----AAGAR**RVSS**SSLARFEDV**ASFSRFA**SSRGRS**LR**IAS**FVAGQTV**SSALHMRSRGPRGADLS**IACK**  
*Cyanidioschyzon* -----EDGTR**PE**TIRHDAL**VEDTVSV**RTPTQPHSEKGVGAGTPQPTDEGVMAEAPSSARRESG**SW**SLDL**SSTRDA****LASAF**IEKDP**EEHARF**AEATQV  
*Dictyostelium* -----KENE-----KW**INIFK**  
*Plasmodium* VSKDGGDQPNTHSAEVEHKNDANDVSQLSNGEKTNKQSGCTT**QDEQ**QTSNPVSENNVSSMSAIPNLS**DK**EKDLKNVLFD-----DW**KIKHV**  
*Cryptosporidium* -----QGNEN**KFKN**LNSVN**FAL**TD**FKMIF**YNTPTN**KRLSK****YIQID**QANS**FIN**NY-----  
*Tetrahymena* -----ENGAFSS-----PY**IVETT**  
*Naegleria* -----VVGNYIDM-----NV**TOVQT**  
*Drosophila* -----HPGNTAGVATPEQQT-----VW**KCVCT**  
*Giardia* -----DDG-----VK**QIGCT**  
*Trypanosoma* -----GNG-----N**FRSVCT**  
*Entamoeba* -----FKDN-----LL**VELDT**  
*Encephalitozoon* -----G**WTLEMS**

*Homo* -----ISGFHSRT**IYDIA**WC-----QLT**GA**L**ATA**CGDDA**IRV**FQE-----DPNSDPQ-----QPT**FSLTAHL**HQAHSQ-D**VNCVA**  
*Saccharomyces* -----LPDVHKRQ**VYNVA**WG-----FNGL**IAS**VGADGV**LAVYEE**-----VDG-----EW**KVFAKRAL**CHGVYE**INVVK**  
*Blastocystis* S1 -----  
*Blastocystis* S7 -----  
*Phytophthora* -----ISNCHERT**IFSVD**WS-----KHGA**FLVT**GAADNA**IRV**FQ-----QPNDTPS-----SFDL**AICQ**KEAHAS-D**INCVR**  
*Phaeodactylum* -----IPDAHLAS**IFSV**AYA-----PSRAGHG**RIATA**GADNR**IQIF**RE-----VSGSVSD-----QPL**FTVET**SATNELGD**VNCVS**  
*Arabidopsis* -----ISGFHDRT**IYSV**HWS-----RDGVI**ASG**AGDDT**IQL**FVD-----SDSDSVD-----GPSY**KLLV**KK**KAHEM**-D**VNSVQ**  
*Micromonas* -----FPCGHRDP**VLVNH**WG-----RNGL**IAA**AGGDNS**VRV**YAA-----M**KSD**SGSHGSGR**AWAEV**GA**IGEH**HE**DGHLD**-D**VNTVA**  
*Cyanidioschyzon* DSSTPRNLD**PPLVSSVMS**G**KQR****NLVIKQVR**VNAGDAGFADEE**DES**V**YCV**DWS-----HDGR**LLATA**CADGH**IRV**YEA-----TEL**RILLD**I**PAAH**S**GAEVN**Y**VQ**  
*Dictyostelium* -----FKNENSRP**IYSID**WS-----SLTNT**IVT**GSADDS**IIF**YEQ-----ESDDTPD-----KY**KILL**KK**NAHDS**-D**VNCTK**  
*Plasmodium* -----TEGYHKRS**ISYLD**WN-----AYED**LIA**ASSFDNS**LKIF**QK-----NLD**TWNL**IENIE**NAHLS**-D**VNCVV**  
*Cryptosporidium* -----DKELY**SYP****IYSI**EW**C**-----NYIN**CI**IVSSADK**SLHL**FSV-----TDSK-----RL**KHIC**E**K**PN**AHNS**-E**IN**SVS  
*Tetrahymena* -----TKNAHART**IYSL**SFS-----EDAT**FLAS**V**GADNT**LV**YQ**KNMY**VTT**EGQD-----NNL**YELLE**KK**VNCH**FA-D**IN**CVA  
*Naegleria* -----ISDVHTRT**IYV**D**WC**VYKHPS**TGQ**SIS**LVATA**GDDNT**IAI**YQF-----DT**TTR**-----QL**KLLT**K**IAN**AHDS-D**IN**CCI

*Drosophila* -----VSGQHSRAIYDVSWC-----KLTGLIATACGDDGIRIFKE---TSDSKPD-----EPTFEQITAEEGAHDQ-DVNSVQ  
*Giardia* -----LHGQRPIYDISLVEPRNAPK-AFNTRYVATGQDGTICLSAI---TITTGVA---VPIVCIIGAHDG-EVNAVC  
*Trypanosoma* -----ASGFAERTIYSVGWA---PCGSDVSPAIVACGSGDNKVTLLGV---YQSRGYE---EVHVSVVAEVPSAHEA-DVNTVA  
*Entamoeba* -----LNNEKYRDIYSIDIN-----DNNVLVSGSDNAIRLFKI---NTIKK-----KLELEIEEKQDAHTN-DVNCVK  
*Encephalitozoon* -----RKLVLPLIYSI-----CSVGENMAYVLMRSTI GIVDS-----NLNLVMSIENVHED-SINSIV

β27                      β28  
*Homo* -----WNP-----KEPGLLASCSDDGEVAFWKYQRPEG---L  
*Saccharomyces* -----WTEL-----NGKTILATGGDDGI VNFWSLEKAA-----  
*Blastocystis S1* -----  
*Blastocystis S7* -----ELLTEVGEDDFI DALEQ-----  
*Phytophthora* -----WSPQLLEDKG-----KKTFLLASAGDDALVRIWSMTI-----  
*Phaeodactylum* -----WHP-----SDGSILATAGDDGSVCIWKFNL-----  
*Arabidopsis* -----WAPD-----KESRLLASASDDKMVKIWKLASEP-----  
*Micromonas* -----WHP-----TDPTCLASCSDDGLIKIWKVTPAEE-----  
*Cyanidioschyzon* -----FOKRRDACGDWSIHLGKRFQDMSTETLQRSYLLASTGDDGRLRVWVLF-----  
*Dictyostelium* -----WNP-----KFKNILASCGDDGFIKIWELQDK-----  
*Plasmodium* -----WCPQKY-----QDYFLLATAGDDCVINIWKYTKG-----  
*Cryptosporidium* -----WIND-----DKKGEFISAGDDGEIALWRFDPE-----  
*Tetrahymena* -----FHP-----SKDILVTVSDDRQIKLWSVEINL-----  
*Naegleria* -----WVK-----NEFGLSSCSDDGAVKFWKLRM-----  
*Drosophila* -----WNP-----VVAGQLISCSDDGTIKIWKVSE-----  
*Giardia* -----DVTQFAGA-----DGHIIVCSGGDDGYINMWNISIEERDLFS  
*Trypanosoma* -----FSRSTNELWGDNSRG-----GEGLLASGGDDNI VRIWRVTAAL-----  
*Entamoeba* -----WIN-----KTLISISVGGDDNMLKIWKIVN-----  
*Encephalitozoon* -----YD-----EGRNRIVSGGDDGILNTIELL-----

**Figure S3**

|                        | Ferredoxin-like domain          |                                                                                                       |
|------------------------|---------------------------------|-------------------------------------------------------------------------------------------------------|
| <i>Homo</i>            | -----MASPFSGALQLTDLDDDFIGPS-QE  | CIKPVK-----VEKRAGSGVA-----KIRIED-----DGSYFQINQDGGTRR-----LEKA                                         |
| <i>Saccharomyces</i>   | -----MSALLSESDLNDFISPA-LA       | CVKPTQ----VSGGKKNVNMNGE----Y--EVSTEP-----DQ-----LEKV                                                  |
| <i>Blastocystis S1</i> | -----MSYFSGTVLLGELDDFIAPA-QA    | CSYGVF-----GDATSTSGGKM-----QLVMED-----DLGDDYGSATSSVIQTNV-----AKVA                                     |
| <i>Blastocystis S7</i> | -----MSYFSGKVLGDLDDFIAPA-QA     | CSYGLF----SDSGSSTHRGA-----QLVMED-----DLGESFSKA--SVIRSSA-----AKIA                                      |
| <i>Phaeodactylum</i>   | -----MSGVFLSNVDDYLAPS-QA        | CVNPLF----STDKKKDDKESG-----VVGTLNSGNHANDDPNSFDTAAASENPAIVPRKRVRRLPAAITASSDWTTPRVPKDVP                 |
| <i>Phytophthora</i>    | -----MASVFLGDLNDYIQPS-QA        | CVNPLF----TSDKSENGSSNGL-----A--KITLET-----ELSAADFAVPQPVKPNIIIRTTT-----QEKA                            |
| <i>Arabidopsis</i>     | -----MSEKFSPTLRLGDLNDFIAPS-QA   | CVTSLKDSKPIVKKSDRP-----QVVVAP-----KQQ-----LEPV                                                        |
| <i>Micromonas</i>      | -----FSGAVKLGDLNDFINPS-QN       | CVVALTAGEVILQRRGAPPS-----DLPPGA-----PTIYGDPS-----APTQ                                                 |
| <i>Dictyostelium</i>   | -----MAEKFSVLLKTELDLDFITPS-QE   | CIKPMI----IDKKNST-----QFTIES-----DGSYVETSDGKQVQ-----MEKA                                              |
| <i>Tetrahymena</i>     | -----MFSGTIKIASLDDYISPS-QE      | CILPIF----DKNSKLTTE-----DPTVKA-----YGMIPQKPDLIKTKTA-----KQTA                                          |
| <i>Naegleria</i>       | MSSYIPQQEPTMSTALMLADLDDFLPMNRQD | CIKPFLL----MTNSKSDSTTSSKNITSENGTAAVSVSLDN-----DDSVGGVSNRNPTRRIGRSNNRGTINLNSQQAEPKkia                  |
| <i>Encephalitozoon</i> | -----MDALIRPPMSFFADLP-KDN-KK    | CIKI-----KIKI-----DSFEESESGLNK-----GSPIL                                                              |
| <i>Drosophila</i>      | -----MSRLSTALQLTDIDDFITPS-QI    | CIKPVQ----IDKARSKTGA-----KIKIKG-----DSFEESESGLNK-----LNKV                                             |
| <i>Giardia</i>         | -----MSLKVVASDLNLTLP-EE         | CVVPLK----PADGPSTGTV-----KLRLKA-----CDPVPIG-----STPV                                                  |
| <i>Entamoeba</i>       | -----MSLSVGLQIAGVDDYIQQN-LV     | CVMPLK----ETPPQEHKGA--KISLGG-----PEEGNELPK-----LTKV                                                   |
| <i>Cryptosporidium</i> | -----MFSTAVKLANLDDYLESS-QD      | CIIVSLL--SDKDDTKP-----KIAVMR-----PAKAQDNKDDKKSQT-----SDKA                                             |
| <i>Cyanidioschyzon</i> | MPRDT--QSRFSTGLRVLDLDFLPS-TA    | CIKPLQ----GGLPPGSAV-----APVYSH-----NAHDANGETN-----TPVA                                                |
| <i>Trichomonas</i>     | -----MSADPAASTS-FD              | CLHPVS----IEERG-----RVKADD-----EATF                                                                   |
| <i>Trypanosoma</i>     | ---M--SANNFASLMLAGM-DYIAPS-EA   | CIILPTK----LQGGTSSD-----SVKRHG-----AG-----NEAV                                                        |
|                        |                                 |                                                                                                       |
| <i>Homo</i>            | KVSLNDCLACSGC-ITS               | AETVLIITQSSHEELKVKLDANKM-----AAPSQQ--RLVVVSVSPQSRASLAARF-----QLNPT-DTARKLTSF                          |
| <i>Saccharomyces</i>   | SITLSDCLACSGC-ITS               | SEEILLSSQSHSVFLKNWGKLSQ-----QQD--KFLVVSVSPQCRLSLAQYY-----GLTLE-AADLC LMNF                             |
| <i>Blastocystis S1</i> | SVSLADCLACTGC-VTS               | AETVLIQQSLQTFDLDELKAKAH-----KLYVAIVSRPSCVSLANKL-----GIPID-EAFERIRSV                                   |
| <i>Blastocystis S7</i> | TVTLEDCLACSGC-VTS               | AETILIQQSTSTFVEELKERKH-----KLYIVIVSRPSCVSIADAL-----SISPD-EAYQHITSV                                    |
| <i>Phaeodactylum</i>   | QASIADECLACSGC-VTT              | AETVLLTQHSVVALKELIAKKE-----NDR--PKIVATISPAAWDLHRHLSREFNCSFSLSLA-QQRWITLL                              |
| <i>Phytophthora</i>    | TISLDDCLACSGC-VTS               | AETVLIQQSFREMLDVLATKEH-----KRVVVTLSPPQSRASLAHF-----EMPVV-AVHRKLVTL                                    |
| <i>Arabidopsis</i>     | KISLKDCLACSGC-ITS               | AETVMLEKQSLDEFLSALSkg-----KDVVSVSPQSRASLAVHY-----DISPL-QVFKKLTTF                                      |
| <i>Micromonas</i>      | KVSLSDCLACSGC-VTS               | AETVLLAQSADEFRRVRAAAM-----SGG--RMVVV-----                                                             |
| <i>Dictyostelium</i>   | TITLNDCLACSGC-ITS               | AESVLIQAQSTVEFSNVLKSIAE-----SKPD--SIVVVISPPQSRASLANHF-----GIDSM-QLHRKLVTF                             |
| <i>Tetrahymena</i>     | KVTLSDECLACSGC-VTT              | AETILIQQQSVEEFLKLQSY-----KHAVVGISQQARASMAHYF-----GLSEE-HIQRALTYF                                      |
| <i>Naegleria</i>       | KIELADCLACSGC-VTT               | AESVLVNVQSQVEQFLTSLKEMKLFSPFIEKIQDKVNVSDLEDDLDSILLSGSKRVVKPQPNISFVITISQQSAASLSSYY-----QCSSVRECLSRLSYL |
| <i>Encephalitozoon</i> | ALSLSDECLACSGC-VS               | ADEAGALSSEDLS--FVLDLS-----PQTSFVLSPPQSKINIFNLY-----REDGMEYR-EFEAVLSSF                                 |
| <i>Drosophila</i>      | DISLQDECLACSGC-ITS              | AEEVLIITQSQEELLKVLQENSK-----NKASEDWDNRTIVITLATQPILSLAHRY-----QIGVE-DAARHLNGY                          |
| <i>Giardia</i>         | KITINDCLMCSGC-VTS               | AEEVFFRELNTALQNAITSGPK-----AG--RPIVLSLSQSAIILSLSSVL-LNITSVEPCTVD-TLQKLEYA                             |
| <i>Entamoeba</i>       | TVRLEDCLACSGC-ITS               | AETVLIQQGLPEFRKNIKELSQ-----R--KKVICITIADECIASMSVVH-----NQPFN-VVWTRVEKA                                |
| <i>Cryptosporidium</i> | TVNVADCLACSGC-VTS               | AEAQLLEDQNVSEFMNILLKQK-----RLTVVVISNSQCSSFACHL-----NCDLI-TIQKRLSGL                                    |
| <i>Cyanidioschyzon</i> | RVTLSDECLACSGC-ITS              | AETVLLATHSDVNFVTAQCSQAD-----AFGAVVVAPAVVASLASVW-----KLAEIESVLERIQT                                    |
| <i>Trichomonas</i>     | KVTLQDECLACSGCAIT               | KDEITIIISEQNTSRIFEKLDDEV-----KDYIVLVATHVVANLAAVR-----NWSAA-KAFSTIKQL                                  |
| <i>Trypanosoma</i>     | KITLQDECLACSGC-VTT              | AETILITISQSRELLKDRALDPT-----RPFVVTISDQSAASIAAFL-----KTDVQ-KAFHIVSGF                                   |
|                        |                                 |                                                                                                       |
| <i>Homo</i>            | FK-KIG-----VHFVFDTA-FSR         | HFSLLESQREFVRRFRGQAD-----                                                                             |
| <i>Saccharomyces</i>   | FQKHQ-----CKYMGTE-MGRI          | ISISKTVEKIIAHKKQKENTG-----                                                                            |
| <i>Blastocystis S1</i> | LY-SHG-----VSVVVRQD-LGE         | VIAMLESITEFDHRRRSTSSPSSISQDPSYADSTRSV-----YPKEGQLFSSLDIEHLSSTNDHYTLLSNPS-----                         |
| <i>Blastocystis S7</i> | L-KIG-----VDIVVRQD-IGC          | ISLVESIAEYTKRASSAAVASVLTQPSYAVNQDLSMLLHLSILLHSHYKPNQVLTSIDLDHITESTDDYDVLSSQA-----                     |
| <i>Phaeodactylum</i>   | WR-ALK-----ISSVLDGN-I           | PLAWSLEEALEFCRAYKRKQT--TNDPDAMAVDVPQDELWQQQLIPSFASERSQSQYVNGET-----                                   |
| <i>Phytophthora</i>    | FR-NLG-----VTLVIDST-C           | SDFALLESRAEFLHRYRNHQTIWARPPSSVAVSSAKTEFLE-----                                                        |
| <i>Arabidopsis</i>     | LK-SLG-----VKAVFDTCS            | RDLVLIESCNEFVSRYKQANS-----                                                                            |
| <i>Micromonas</i>      | -----VSVVLDTT-ASR               | DLLESCEEFVSRYRNAKH-----                                                                               |
| <i>Dictyostelium</i>   | LK-SIG-----VNHVFDTS-FS          | REFALIESAEFIARYKQTYD-----                                                                             |
| <i>Tetrahymena</i>     | FQDQLN-----                     |                                                                                                       |
| <i>Naegleria</i>       | FKVKFG-----AVAVFETSTLAR         | LVSHLECEDFLNRYKEGK-----                                                                               |
| <i>Encephalitozoon</i> | LRSKFN-----IHRIVDTS-YL          | RSKIYEETIREYMAT-----                                                                                  |
| <i>Drosophila</i>      | FR-SLG-----ADYVLSTK-V           | ADDIALLECQRQFVDYRENE-----                                                                             |
| <i>Giardia</i>         | LRTRVADLRHCAYED                 | APPVYIVSEA-QHQEQSVLMNVRQISLLMQSSEP-----                                                               |
| <i>Entamoeba</i>       | LK-KEG-----VDELRLDS-QA          | QDISLFGIYDEFKEYQKMN-----                                                                              |
| <i>Cryptosporidium</i> | FK-HIG-----ARFVMNST-I           | SEYISLLETKEYEFISRYKAKSD-----                                                                          |

**Cyanidioschyzon** FD-KFG-----AFAVVLNS-VGR**C**LSVLET**CA**QAVERLQPDQNDG-----  
**Trichomonas** FLSKGA-----QKVVLDTD--IQLVFRRLVVKFEFIENQTL-----  
**Trypanosoma** FRAVLN-----ARYVSDLH-WALRISVEKTAEEY**CRRVR**CERE-----  
**H**  
**Homo** -----CRQALPLLASA**C**PGW**C**YAEKTHG**S**FILPH**I**STAR**S**PQ**Q**VM**G**SL**V**K**D**F-----F-----  
**Saccharomyces** -----ADRKPLLSAV**C**PGFL**I**Y**E**TK**T**K**P**Q**L**V-PMLLN**V**K**S**P**Q**Q**I**T**G**SL**I**R**A**T-----  
**Blastocystis S1** YFQNESSHPSITANHPFIT**S**N**C**PGW**V****C**YAEK**K**TH**A**L**V**-PFL**S**T**T**K**S**A**Q**Q**I**M**G**S**L**L**R**K**M**-----L-----  
**Blastocystis S7** YHALPETS**P**HIGAN**A**PL**I**T**S**N**C**PGW**V****C**YAEK**K**V**H**T**L**V-PFL**S**S**V**R**S**A**P**Q**V**T**A**ALL**R**RL-----L-----  
**Phaeodactylum** KTVYHDGGAQ**Q**AG**S**L**P**LL**S**G**S****C**PAV**V****C**L**V**E**K**S**T**H**K**A**V**-P**H**L**A**T**T**K**S**P**L**A**L**A**G**E**F**W**K**R**Q**H**F**-----  
**Phytophthora** PSTTAN**P**LQ**D**PL**R**AMP**L**ASS**C**PGW**I****C**YAE**K**S**Q**P**N**A**I**-P**F**I**D**T**T**K**S**P**Q**Q**I**A**G**S**I**I**K**R**F**-----V-----  
**Arabidopsis** -----DDGEN**S**Q**S**PL**P**V**L**S**S**A**C**PGW**I****C**YAE**K**Q**L**G**S**Y**V**L**P**Y**V**S**S**V**K**S**P**Q**Q**A**I**G**A**A**I**K**H**H-----L-----  
**Micromonas** AAVTNT**P**PP**S**PA**D**V**L**P**V**L**T**S**A****C**PGW**V****C**YAE**K**T**H**G**G**A**V**L**N**H**V**S**A**V**K**S**P**Q**Q**V**M**G**C**I**V**K**R**K-----I-----  
**Dictyostelium** -----K**L**P**L**M**L**S**A**S**C**PGW**I****C**YAE**K**T**H**G**D**Y**V**L**P**Y**I**S**T**T**K**S**P**Q**Q**I**M**G**T**L**V**K**Y**Y-----L-----  
**Tetrahymena** -----V**Q**Q**S**V**P**V**L**S**S**E**C**PGW**A****C**YAE**K**A**V**G**E**F**V**I**P**Y**M**S**Q**V**K**S**P**Q**Q**V**M**G**S**L**V**K**N**S-----L-----  
**Naegleria** -----P**V**F**A**S**A****C**PGW**I****C**YAE**K**T**Q**P**E**I**I**-P**S**I**S**T**V**K**S**P**Q**Q**I**M**G**T**F**V**K**K**F**I**T**S**N**M**K**Q**L**-----  
**Encephalitozoon** -----N**H**L**I**V**S**A**C**PGV**V**T**Y**I**E**R**T**A**P**Y**L**I-G**Y**L**S**R**V**K**S**P**Q**Q**M**A**F**S**L**V**K**G**S**-----  
**Drosophila** -----L**T**M**L**S**S**S**C**PGW**V****C**YAE**K**T**H**G**N**F**I**L**P**Y**V**S**T**R**S**P**Q**Q**I**M**G**V**L**V**K**Q**I**-----L-----  
**Giardia** -----R**S**N**I**A**I**I**T**H**C**PAV**R**L**F**I**T**K**R**N**R**E**L**I-P**Y**I**V**S**T**A**S**P**M**E**L**F**G**A**S**Y**C**N**I**-----  
**Entamoeba** -----K**V**L**L**T**S**T**C**PGW**V****C**Y**E**K**M**Q**G**K**M**F**E**Y**M**S**K**V**A**S**M**T**I**A**G**M**I**M**K**K**Q**-----  
**Cryptosporidium** -----L**P**M**I**I**S**H**C**PGW**I****C**Y**E**K**S**L**N**S**S**V**L**P**L**L**S**K**V**R**S**A**Q**Q**L**Q**G**I**L**I**K**T**L**T**L**E**I**Y**N**Q**L**L**F**L**Y**K**F**R**L**S**N**S**Y**G**T**N**M**N**I**K**T**T-----  
**Cyanidioschyzon** -----S**G**A**Q**Q**P**L**F**A**S**A**C**PGW**T**F**Y**E**K**T**Q**P**H**L**V**-S**C**L**A**T**A**K**S**P**Q**A**M**M**Q**L**L**V**R**H**E**-----  
**Trichomonas** -----S**P**F**M**I**S**R**C**A**G**S**V**V**Y**E**R**K**T**S**Y**A--D**H**L**A**Q**I**K**P**Y**P**Q**L**Y**A**M**Y**E**K**K**I**-----  
**Trypanosoma** -----R**L**P**L**I**V**S**A****C**PGW**V****C****C**E**K**Q**G**A**A**I**L**-P**L**L**C**P**V**M**S**P**Q**I**A**G**C**Y**S**K**T**L-----  
**H**  
**Homo** -A**Q**Q**Q**--H**L**T**P**D**K**I**Y**H**V**T**V**M**P****C**Y**D**K**K**L**E**A**S**R**P**D**F**F**N**Q**E**-----H**Q**T**R**D**V**D**C**V**L**T**T**G**E**V**F**R**L**L**E**E**E**G--V**S**L**P**D-----  
**Saccharomyces** -F**E**S**L**--A**I**A**R**E**S**F**Y**H**L**S**L**M**P****C**F**D**K**K**L**E**A**S**R**P**E**S**L**D**-----D**G**I**D****C**V**I**T**P**R**E**I**V**T**M**L**Q**E**L**N**L**D**F**K**S**F-----  
**Blastocystis S1** -P**T**L**T**N**E**P**I**Q**S**D**I**Y**I**A**S**V**S****C**Y**D**R**K**L**E**A**S**R**R**D**F**M**D**P-----A**G**I**H**E**I**D**C**V**L**A**T**Q**E**I**A**E**L**L**E**K**P**A**P**S**A**P**S**A-----  
**Blastocystis S7** -P**A**H**V**V**P**A**L**A**N**G**D**I**F**I**A****C**V**A**S**C**Y**D**R**K**L**E**A**S**R**R**D**F**L**D**A-----D**G**T**R**H**V**N**C**V**L**S**S**Q**E**L**F**D**L**I**Q**N**P**P**D**F**R**H**A**S-----  
**Phaeodactylum** -D**K**H**T**--S**L**P**R**Q**E**Y**Y**H**V**A**I**M**P****C**H**D**K**K**L**E**A**S**R**K**D**F**E-----D-----E**S**G**D**K**D**V**D**I**V**I**T**T**Q**E**C**M**R**L**I**Q**E**L**L**D**V**S**I**D**D**I**V**K**C**F**R**E**L**P**L**A**T**L**S**D**C**  
**Phytophthora** -S**G**E**H**--G**V**K**P**S**E**V**Y**H**V**A**V**M**P****C**F**D**K**K**L**E**A**S**R**K**D**F**Q**D**A**E**-----D**A**T**K**D**V**D**C**V**L**A**T**E**I**E**L**I**E**S**L**N**V**D**F**A**S**L-----E  
**Arabidopsis** -**C**Q**A**L--G**L**R**L**H**E**V**Y**H**V**T**V**M**P****C**Y**D**K**K**L**E**A**A**R**D**D**F**V**D**D**G**T**Q**D**N**-----G**D**--L**K**L**T**E**V**D**S**V**L**T**T**G**E**I**M**D**L**I**K**L**G**-V**D**F**K**D-----  
**Micromonas** -A**A**E**L**--G**V**P**A**S**A**V**F**H**A**T**V**M**P****C**F**D**K**K**L**E**A**S**R**D**F**A**M**D**D**L**G-----E**N**V**R**E**V**D**C**V**L**T**T**G**E**V**A**E**M**I**A**V**A**G**L**G**A**P**S**-----S  
**Dictyostelium** -S**K**K**I**--N**T**L**P**S**N**I**Y**H**V**T**I**M**P****C**Y**D**K**K**L**E**A**S**R**S**D**F**Y**N**D**V**-----F**K**T**K**D**V**D**C**V**L**S**T**S**E**V**L**L**L**K**E**H**G**D**V**D**L**L**K**-----  
**Tetrahymena** -A**S**K**M**--G**I**E**S**K**D**I**L**F**V**S**V**M**P****C**Y**D**K**K**V**E**S**A**R**K**E**F**E**R**-----N**G**I**K**D**V**D**V**L**T**A**Q**E**I**M**D**L**L**K**K**V**E**G**Q**K**L**V**D**-----  
**Naegleria** -S**N**E**I**--S**L**E**N**L**K**V**Y**H**T**T**V**M**P****C**F**D**K**K**L**E**A**S**R**P**D**F**T**N**-----D**P**F**D**K**V**D**M**V**L**T**S**S**E**I**T**E**L**L**Q**K**E**L**Q**I**E**T**P**E-----D**F**I**R**N**T**E**N**F**I**  
**Encephalitozoon** -----R**T**V**S**V**M**P**C**Q**D**K**K**L**E**N**G**R**D**G**V**K-----F**D**F**I**L**T**T**R**G**F****C**K**A**L**D**S**L**G**F**R**R**P**A**R-----D**F**I**R**N**T**E**N**F**I**  
**Drosophila** -A**D**K**I**--N**V**P**A**S**R**I**Y**H**V**T**V**M**P****C**Y**D**K**K**L**E**A**S**R**E**D**F**F**S**K**A**-----N**N**S**R**D**V**D**C**L**R**W**N**N**C**S**V**R**L**-----  
**Giardia** -----D**A**A**P**L**L**V**S**I**Q**P**C**Q**D**R**K**L**E**Q**F**R**G**-----A**A**V**D**V**C**L**T**A**Q**E**V**H**G**F**L**A**E**T**P**Q**G**P**A**P-----A**F**  
**Entamoeba** -----N**S**E**I**Y**H**V**S**I**Q**M**C**F**D**K**K**L**E**A**T**K**T**Y-----N**N**I**H**V**I**D**C**V**L**T**T**S**E**I**D**S**I**I**D**W**N**E**P**I**N**E**I**T-----  
**Cryptosporidium** -F**T**Q**N**D**D**F**V**E**Q**S**D**I**F**H**V**A**I**M**P****C**H**D**K**K**L**E**S**T**R**S**S**L**S**L**K**S**-----S**D**K**N**S**S****C**P**E**V**D**I**V**L**A**T**S**E**V**G**E**I**I**K**L**A**G**F**N**S**L**L**D**-----  
**Cyanidioschyzon** -----L**G**E**H**A**W**T**V**S**I**A**P****C**Y**D**K**K**L**E**S**Q**R**D**A**K**D-----S**E**H**V**F**V**L**T**A**T**E**V**L**E**L**A**E**R**A**P**H**M**P**N**D-----  
**Trichomonas** -----L**Q**S**T**N**Y**V**L**Y**I**G**P****C**Y**D**R**K**L**E**A**A**R**F**E-----E**D**V**D**A**V**L**T**I**A**E**I**N**D**H**I**T**E**P**T**E**E**I**P**V**K**-----  
**Trypanosoma** -----I**P**Q**M****C**H**V**S**V**Q**P****C**F**D**R**K**L**E**A**A**R**D**G**S**S**V**-----S**G**E**R**Y**T**D**F**V**L**S**T**Q**E**L**L**D**W**M**L**E**V**D**P**S**L**P**W**Q-----  
**\* \* \***  
**Homo** -L**E**P**A**P**L**D**S**L**C**-----S**G**A**S**A**E**-----E**P**T**S**H**R**G**G**-----G**S**G**G**Y**L**E**H**V**F**-----R**H**A**A**R**E**L**F**G**I**H**V**-----  
**Saccharomyces** -----L**T**E**D**T**S**L-----Y**G**R**L**S**P**P**G**W**D**-----P**R**V**H**W**A**S**N**L**G**G-----T**C**G**G**Y**A**Y**Q**Y**V**-----T**A**V**Q**R**L**H**P**-----  
**Blastocystis S1** -----P**V**R**V**W**W**D**E**K**R**W**E**A**M**E**S**G-----C**R**T**A**F**D**D**V**L**M**-----S**S**G**G**V**L**Q**S**L**L**K**F**E**L**L**S**R**P**A**A**R**L**V**F**A**L**F**V**E-----  
**Blastocystis S7** -----S**V**V**W**N**E**A**W**S**A**L**E**A**P**-----L**L**T**D**F**D**A**A**L**F**-----S**S**G**G**V**L**E**G**V**V**A**S**V**V**A**S**R**P**S**A**N**V**E**W**V-----  
**Phaeodactylum** T**S**F**T**K**A**E**P**V**L**-----I**A**D**S**N**S**H**C**I**T**T**L**T**T**E**D**-----A**E**I**S**S**N**A**A**F**T**L-----G**S**G**G**Y**A**S**F**I**F**-----A**Y**A**A**K**R**L**F**G**V**Q**L**D**A**H**E**L**P**  
**Phytophthora** L**A**T**L**T**P**E**E**V**M**L-----S**G**V**S**E**D**-----G**S**S**V**L**G**S**S**Q**N**A-----S**S**G**H**L**E**H**I**F-----R**Y**A**A**K**E**L**F**N**V**D**V**-----  
**Arabidopsis** -L**E**E**S**P**L**D**R**V**L**-----T**N**V**T**-----E**E**G**D**L**Y**G**V**A**G**-----S**S**G**G**Y**A**E**T**I**F**-----R**H**A**A**K**A**L**F**G**Q**T**I**-----  
**Micromonas** A**L**A**F**N**P**R**P**R**C**L-----S**T**P**P**-----D**A**F**Q**L**H**P**V**V**R**S-----G**S**G**G**Y**L**D**A**V**F**-----R**H**A**A**K**V**L**H**G**V**D**V**-----  
**Dictyostelium** -L**E**E**A**T**L**D**N**S**I**-----F**N**N**V**I**F**N**Q**Q**T**G-----Q**P**E**K**F**L**G**V**T**G**-----S**T**G**G**Y**F**E**Y**L**F**-----R**R**A**A**K**E**L**F**G**K**E**I**-----  
**Tetrahymena** -V**Q**E**Q**I**K**Q**A**T**N**V**N**S**N**D**E**S**K**N**E**L**I**S**K**E**R**E**Y**I**E**N**N**I**F**Y**E**N**L**D**I**S**R**I**V**S**N**I**E**Y**L**F**G**D**S**Q**T**F**D**Q**L**L**P**I**L**S**N**I**F**D**S**T**I**-----G**S**N**D**Y**L**D**Y**I**I**-----R**R**A**A**S**D**I**H**L**N**P**D**-----  
**Naegleria** K**N**E**Y**Q**L**D**S**I**F**-----E**I**L**S**Q**S**T**H**H**S**T**Q**D**I**S**E**D-----A**T**L**L**E**W**L**G**S**E**S**D**A**T**G**S**G**G**Y**C**E**I**V**F**-----K**Y**A**A**K**L**F**G**I**D**L**R**-----  
**Encephalitozoon** -----A**S**G**K**S**L**C**S**M**E**E**A**-----E**T**T**Q**W**N**I**G**T-----S**S**G**G**Y**A**E**F**I**L**-----

*Drosophila* -----  
*Giardia* CSSYTPSPTSF---WQYALGPLLVLYLKAERWISDESL-----SHLLV-----PHAGGIDLRW-----AKVGNELFSCTIEL-----  
*Entamoeba* -----STRMKGFIS-----SPAQYIALME-----  
*Cryptosporidium* -VPEAPLDNLWLNQNFQITKKHNSLLITENYVSNQI-----LNQFPWLIPSYFNNSGGFCHEYII-----RSAIKELAGDNID-----  
*Cyanidioschyzon* -----ARRQLRSQQVS-----ALTKFRGAWWATFGGLSGGYAVEVF-----RYVAQYVFKHRVS-----  
*Trichomonas* ----FPADTDL-----NAISQKLGQIKDS-----LNSDSIYQLI-----AEIEPTLNEEEEIN-----  
*Trypanosoma* ----APLSDSL-----EPLPLPPEE-----PKRSFAATME-----GSGGYHRYAM-----HRAARELHGLELA-----

*Homo* -----AEVTYKP--LRNKDFQEVTL-----EKEGOVLLHFAMAYGFRNIQNLVQRLKR-----GRC-----PYH  
*Saccharomyces* -----GSQMIVLE--GRNSDIVEYRL-----LHDDRIIAAASELSGFRNIQNLVVRKLTSGSGSERKRNITALRKRRTGPKANSREMAAATAATADPYHSD  
*Blastocystis S1* -----NSMKRTRT--VRNSDFVESSV-----CVGEEIVFRGAFIYGFRNIQNLAMKIKR-----GKC-----VYD  
*Blastocystis S7* -----RTRT--VRNSDFVEVTV-----VDGEERVFSGAFVYGFNRNIQNLVMKTKV-----GKC-----AYD  
*Phaeodactylum* WEPVGPDQAGRVSARVAAST--QRRRDYHYVALYRSQDGNFTT---NANLSSDSKPIHLFAIAYGMQTLQRVLKPYTSEHLQ---SGI-----GYD  
*Phytophthora* -----NGPL-----DRS-----  
*Arabidopsis* -----EGPLEFKT--LRNSDFREVTL-----QLEGKTVLKFALCYGFQNLQNI VRRVKT-----RKC-----DYQ  
*Micromonas* -----TGPLKYATPSSRNLDLKEVTL-----EVDGAVVLRFAAAYGFRNIQNI VRKCKAGSVA-----TGD-----AYD  
*Dictyostelium* -----EGEIEYKV--GRNTDFKEASL-----EVDGKVLVSFAKAYGFRNIQNI VRKIKTTASSK-----KEP-----QYH  
*Tetrahymena* -----QYEIITKQ--GRNSDFNEIFL-----VKDGANILSFARVYGLRNIQNI IRNLRQ-----NKC-----KYD  
*Naegleria* -----DKTLIFES--KRNSDYRETVL-----VDPTDSSKILLRFVIANGFRNIQNLVRRMKQAD-----NSE-----PFH  
*Encephalitozoon* -----GKHCVVETREIRN-GIKEHLL-----DDGRTI---SQTGLENSINYFKSSKT-----KGP-----RHK  
*Drosophila* -----SVRYRSTISLI-----  
*Giardia* -----SQNQSPYS CVV-----IYKSAGYHNLQNLVRRVHALCP-----NKD-----ALY  
*Entamoeba* -----QKKEPFKV--TRNKDFLENDG-----IAIANGFRNIQNVVRFVK-----SKT-----KLQ  
*Cryptosporidium* -----NKVQLPFN--KLKNDILEAKY-----IKNNVELNYCLVYGFRAIQSISRKLNQKNASQHTQYKQNVVNHV-----NYH  
*Plasmodium* -----  
*Cyanidioschyzon* -----DAVLEPAAVRERNPDLRQLLLYQHRSSGDFVFNFRPVIADDDLQLRYSVATAYGFRNIQNI VRQYKHT-----GRC-----NWN  
*Trichomonas* -----SLISEL--PSRFDLEISTN-----SFDGETLNKRLT---KTLDMSSGKKV-----PKP-----APR  
*Trypanosoma* -----PRDIHYEM--KRNANHHLTT-----PSNPGEV--FCVAYGFQQIQNTVRGIKRKL-----SVA-----SYT

**H-cluster**

*Homo* YVEVMA **CP**SGCLNNGGQLQAPDRPS-----RELLQHVERLYGMVRAEAPEDAPGVQ-----  
*Saccharomyces* YIEVNA **CP**GACMNGGGLLNGEQNSL-----KRKQLVQTLNKRHGEELAMVDPLTLGPKLEEAAARPL-----SLEYVFPVVKQAVEKDLVSVG---  
*Blastocystis S1* AVEVMA **CP**SGCLNNGGQIRPEKRENMMKIAEELGVAVTKWKRRI G-----MFERDLRSRLNDYWRVESK **C**MMYW  
*Blastocystis S7* VVEVMA **CP**SGCLNNGGQIKPEKREDMML-----  
*Phaeodactylum* YVEAMA **CP**SGCLVNGGGQIRTSARETP---TETRFVGTQTTLRVPQMNESSGRTQLGAGS-----SLHTRYHIVPPLQHS LGAA---  
*Phytophthora* -----  
*Arabidopsis* YVEIMA **CP**AGCLNNGGQIKPKTGQS-----QKELIHSLEATYMNDDTTLNTDPYQNPT-----AKRLFEEWLKEPGSNEAKK-----YLHTQYHPVVKSVTSQL-----  
*Micromonas* FVEIMA **CP**SGCLNNGGQLPP-----  
*Dictyostelium* FVEVMA **CP**SGCLNNGGQIKAAASGSL-----REQKLLIEQSEQKYQDLSIQSYEQLPST-----LEIKDIYDQWMNGPFS LDAKT-----KLHTQYHMIEKSNALS-----  
*Tetrahymena* YIEIMA **CP**SGCLNNGGQLKSLDENM-----KTKDLIEKIQEILRKKSVISNDQYNNLAFQQIIRDSTNI-----YFETIFKHIEKLNTOSS-----  
*Naegleria* FVEVMA **CP**IGCLNNGGQVVKQPKITLDIDSPSSVTITPKQH LAQTEKLYRDDISNIKSL **C**ENNSNLVKEGLNNLYNWIKGSVGSVQAKS-----ILHTQYHAVEKLNIVTPTA-----  
*Encephalitozoon* MTEIFL **CK**NGCIGGPGQERVNDVEMDIREYDRNGREQPRIFYSSPGL-----EKRVFREVAKRVDLR-----  
*Drosophila* -----  
*Giardia* ILDLHA **CP**YGCY--GG **C**IAGDDRHPVSSVASASHAAVVSADKSVLSHILAAGT **CP**GLLEELVQAVDGITPQET-----VIRTDGEVVSPEEIAARKGIQGGI  
*Entamoeba* FIEVEA **CP**GGCICGGGQIK **C**SP-----KEKDERVKKMMEILEPKVVDEKNKSIYESIKD-----SIKLTFDIKESAQENALH-----  
*Cryptosporidium* LIEAMA **CPT**GCVSGGGQIILSQNDQNDNSDLNKRKNIKFIDEVQEAALYKGINLNKNQEIILPDE---IPIVNILYEYLIHIDKQIDRSSGLKLPFLRNDFVSI NEVPTASS-----  
*Cyanidioschyzon* FVEVMA **CP**GGCNGNGLWVVDPTSTPVSASVAVANRVFAQRTRQERI QEMERSLQRLP **C**YHVDELPLQRELWATLREAEFQ-----SLRFEF **C**GFNDRQQQEATYRQQDG  
*Trichomonas* LAQIDF **CK**GGCLVGGGQIRGNSP-----AQRALIAATQEVHTQNESTNISFPTELYNELIKF-----GYKTHYESLPQEEEKDQ-----  
*Trypanosoma* FIELMA **CPE**GC L NNGGQARNGTTQSHVETTAAAKSAFISYISGSQPTMEVRRGGMDGTSVANSNRVDVGDGPPFPFLSAAFAEVEKQVGS S LWS **C**TFT--DRQREFEATLNTGGVHS-----

*Homo* -----  
*Saccharomyces* -----STW  
*Blastocystis S1* VLREDRRKHMRCFTLDSM  
*Blastocystis S7* -----  
*Phaeodactylum* -----AGVPVKDTQW  
*Phytophthora* -----  
*Arabidopsis* -----NNW



|                        |                    |
|------------------------|--------------------|
| <i>Micromonas</i>      | -----              |
| <i>Dictyostelium</i>   | -----IKW           |
| <i>Tetrahymena</i>     | -----LNW           |
| <i>Naegleria</i>       | -----LKW           |
| <i>Encephalitozoon</i> | -----VDW           |
| <i>Drosophila</i>      | -----              |
| <i>Giardia</i>         | RIQD-----LAW       |
| <i>Entamoeba</i>       | -----LNW           |
| <i>Cryptosporidium</i> | -----LKW           |
| <i>Cyanidioschyzon</i> | DIKSQVTVSERHRLVHQW |
| <i>Trichomonas</i>     | -----FAW           |
| <i>Trypanosoma</i>     | -----LKW           |

Figure S4

*Homo sapiens-nbp35*  
*Saccharomyces cerevisiae-nbp35*  
*Dictyostelium purpureum-nbp35*  
*Entamoeba dispar-nbp35*  
*Naegleria gruberi-nbp35*  
*Guillardia theta-nbp35*  
*Encephalitozoon cuniculi-nbp35*  
*Trypanosoma vivax*  
*Giardia lamblia-nbp35*  
*Blastocystis-nbp35*  
*Blastocystis sp. NandII-nbp35*  
*Phytophthora infestans-nbp35*  
*Phaeodactylum tricornutum-nbp35*  
*Arabidopsis thaliana-nbp35*  
*Micromonas sp.-nbp35*  
*Cyanidioschyzon merolae-nbp35*  
*Cryptosporidium hominis-nbp35*  
*Tetrahymena thermophila-nbp35*  
*Metallospira cuprina*  
*Pyrococcus furiosus*  
*Methanococcus maripaludis*  
*Homo sapiens-cfd1*  
*Saccharomyces cerevisiae-cfd1*  
*Dictyostelium purpureum-cfd1*  
*Entamoeba dispar-cfd1*  
*Naegleria gruberi-cfd1*  
*Guillardia theta-cfd1*  
*Encephalitozoon cuniculi-cfd1*  
*Trypanosoma vivax-cfd1*

*Homo sapiens-nbp35*  
*Saccharomyces cerevisiae-nbp35*  
*Dictyostelium purpureum-nbp35*  
*Entamoeba dispar-nbp35*  
*Naegleria gruberi-nbp35*  
*Guillardia theta-nbp35*  
*Encephalitozoon cuniculi-nbp35*  
*Trypanosoma vivax*  
*Giardia lamblia-nbp35*  
*Blastocystis-nbp35*  
*Blastocystis sp. NandII-nbp35*  
*Phytophthora infestans-nbp35*  
*Phaeodactylum tricornutum-nbp35*  
*Arabidopsis thaliana-nbp35*  
*Micromonas sp.-nbp35*  
*Cyanidioschyzon merolae-nbp35*  
*Cryptosporidium hominis-nbp35*  
*Tetrahymena thermophila-nbp35*  
*Metallospira cuprina*  
*Pyrococcus furiosus*  
*Methanococcus maripaludis*  
*Homo sapiens-cfd1*  
*Saccharomyces cerevisiae-cfd1*  
*Dictyostelium purpureum-cfd1*  
*Entamoeba dispar-cfd1*  
*Naegleria gruberi-cfd1*  
*Guillardia theta-cfd1*  
*Encephalitozoon cuniculi-cfd1*  
*Trypanosoma vivax-cfd1*

MEKERIVPEGAPDSCPGVKSQLAGKVEPCSGCPHQPNCALGNPNLDGRIIP EEAPSQCPTQSNLAGHTVVCSGCCPHQPNCSKALNVHYKLVDPNAPTCCPGTLSQDAGKVNSCSGCPN

---MKIASNRRIAFFGGLISGIIFKDYFKTF  
QQKCNSSGQSNITIQEHKKLVDPNAPQNC PGVDSQNAKTEVCSVCSPHQPNCALGKLVGHKVVVPVDAPEQCPTQAQNAKTPVCSGCCPHQPNCSAAGKQANI TADKKIVPVNANTGCVGTQ

|                                        | N-terminal                               | CX13CX2CX5C motif | Walker A                |
|----------------------------------------|------------------------------------------|-------------------|-------------------------|
| <i>Homo sapiens-nbp35</i>              | -----MEEVPHD                             | CG                | ADSAQAGRGASCGGCPNQR     |
| <i>Saccharomyces cerevisiae-nbp35</i>  | -----MTEILPHVNDVLP                       | PG                | PESDMAGKSDACGGCANKEI    |
| <i>Dictyostelium purpureum-nbp35</i>   | -----MSDQLVAPPPEHC                       | PG                | TQSEMSGKSAACAGCPNQI     |
| <i>Entamoeba dispar-nbp35</i>          | -----MSCDKNCATCP                         | DS                | BQAGS SGC THNCATC SHKGS |
| <i>Naegleria gruberi-nbp35</i>         | -----MENKPSSEAVPENANEHC                  | PG                | VESQNAGKSSSCAGCPNQSL    |
| <i>Guillardia theta-nbp35</i>          | -----                                    | CG                | MAGKSSTCVGC             |
| <i>Encephalitozoon cuniculi-nbp35</i>  | -----MGESC                               | PG                | VSSKDAGKAECKGCPNVGYC    |
| <i>Trypanosoma vivax</i>               | -----MEGANSTC                            | VG                | PESEAGVAPSCQGC          |
| <i>Giardia lamblia-nbp35</i>           | -----MTADHKNCRSRA                        | VG                | PVSAASNCQPDKAGC         |
| <i>Blastocystis-nbp35</i>              | -----MSSVPNANPSC                         | VG                | PQSEQAGRAAGCQGC         |
| <i>Blastocystis sp. NandII-nbp35</i>   | -----MSSVPNANPSC                         | VG                | PQSEQAGRAAGCQGC         |
| <i>Phytophthora infestans-nbp35</i>    | -----MATSAPANANAEC                       | VG                | PQSEQAGKAGCQGC          |
| <i>Phaeodactylum tricornutum-nbp35</i> | -----MTEASENAGDAPANANTC                  | VG                | PTSETAGKASACDGC         |
| <i>Arabidopsis thaliana-nbp35</i>      | -----MENGDIPEANNEHC                      | PG                | PQSESAGKSDSCAGC         |
| <i>Micromonas sp. -nbp35</i>           | -----MDQVTIPEDANTNC                      | PG                | TNADAAGKVPACTGCPNQGA    |
| <i>Cyanidioschyzon merolae-nbp35</i>   | -----MTETSVPVSC                          | PG                | TESEQAGRAAACGCPNQTA     |
| <i>Cryptosporidium hominis-nbp35</i>   | SRLTINYLKSIFISYIKTDSVISKYQNHFNQIDNC      | VG                | VDS PDAG IADSCAGC       |
| <i>Tetrahymena thermophila-nbp35</i>   | SQQAGTASSCAGCPNKAKCSSQNTTEENKVVDPNANEHC  | PG                | TQNKEAGKMSACGCPNQIC     |
| <i>Metallospira cuprina</i>            | -----MSSNPFRLQSPQAKQPRDLRKAPAFQ          | CG                | VQGADLKIQRMRNKVYKVA     |
| <i>Pyrococcus furiosus</i>             | -----MTIKAPTLNVPGLGVDPLTQRIKEKEKWKYKIAVL | CG                | SGNCDSCGSSSDCSDTKK      |
| <i>Methanococcus maripaludis</i>       | -----MAEEC                               | CG                | MMEQNAQIRDNMSKIKYIAVMS  |
| <i>Homo sapiens-cfd1</i>               | -----                                    | CG                | MEAAAEPGNLAGVRHII       |
| <i>Saccharomyces cerevisiae-cfd1</i>   | -----                                    | CG                | MEEQIGVPAASLAGIKHII     |
| <i>Dictyostelium purpureum-cfd1</i>    | -----                                    | CG                | MDKIKHII                |
| <i>Entamoeba dispar-cfd1</i>           | -----                                    | CG                | MTELNADRNFVGDHVKNV      |
| <i>Naegleria gruberi-cfd1</i>          | -----                                    | CG                | MQEQLFSEKLSHIKNI        |
| <i>Guillardia theta-cfd1</i>           | -----                                    | CG                | MLQEGTKAVVLS            |
| <i>Encephalitozoon cuniculi-cfd1</i>   | -----                                    | CG                | MSRIAVMS                |
| <i>Trypanosoma vivax-cfd1</i>          | -----                                    | CG                | MTSALHGVKHI             |

|                                        |               |    |                  |    |            |       |           |    |        |
|----------------------------------------|---------------|----|------------------|----|------------|-------|-----------|----|--------|
| <i>Homo sapiens-nbp35</i>              | SAHLAHGLA     | CG | EDENTQIALLDIDICG | SP | GLEGEVHQSG | SG    | WSPVY     | VE | DNLGVM |
| <i>Saccharomyces cerevisiae-nbp35</i>  | AAMLSWALS     | CG | ADELQVGAMDLDICG  | SP | GKETVHESN  | SG    | WTPVY     | VT | DNLATM |
| <i>Dictyostelium purpureum-nbp35</i>   | SSQLSFALA     | CG | MNTEEQVGLLDIDICG | SP | GLEGEVHISG | SG    | WDPVY     | VE | DNLAVM |
| <i>Entamoeba dispar-nbp35</i>          | TTQFGWVLS     | CG | EDKQVGI          | CD | LDDICG     | SP    | IQMF      | VT | ENLCTM |
| <i>Naegleria gruberi-nbp35</i>         | SSQLALTMA     | CG | LCEKDSVPQVGLD    | V  | DICG       | SP    | ITMF      | YE | DNLAVV |
| <i>Guillardia theta-nbp35</i>          | ASQVAMALS     | CG | GSGNVTGLLDIDV    | CG | SP         | APRML | GL        | VD | ENL    |
| <i>Encephalitozoon cuniculi-nbp35</i>  | TRNIAELMS     | CG | SRGIAT           | C  | LDDLDL     | SG    | SP        | VT | GTDG   |
| <i>Trypanosoma vivax</i>               | TKELAFALG     | CG | RHGLEVA          | V  | VDL        | V     | CG        | ID | GVR    |
| <i>Giardia lamblia-nbp35</i>           | STQLGFYLA     | CG | ENMEKNVGLMD      | V  | DICG       | SP    | ITMT      | VL | FNMA   |
| <i>Blastocystis-nbp35</i>              | SSQIAFSLA     | CG | SQGFQVGLD        | I  | DICG       | SP    | PRMM      | VD | DNL    |
| <i>Blastocystis sp. NandII-nbp35</i>   | SSQIAFSLA     | CG | SQGFQVGLD        | I  | DICG       | SP    | PRMM      | VD | DNL    |
| <i>Phytophthora infestans-nbp35</i>    | ACQLAFALA     | CG | GKGFQVGLD        | V  | DITG       | SP    | PRML      | VD | DNL    |
| <i>Phaeodactylum tricornutum-nbp35</i> | AAQLSHTLS     | CG | NQGYAVGLD        | V  | DICG       | SP    | APRML     | AS | ANL    |
| <i>Arabidopsis thaliana-nbp35</i>      | SAQLSFALA     | CG | GMDHQVGLMD       | I  | DICG       | SP    | PKML      | VE | DNL    |
| <i>Micromonas sp. -nbp35</i>           | AAQLAYALS     | CG | SRNYRVGLLD       | V  | DICG       | SP    | PLLF      | VT | DNL    |
| <i>Cyanidioschyzon merolae-nbp35</i>   | AAQLAFAFASGVA | CG | EAVDRELEVGLL     | D  | ADVTG      | SP    | PHLL      | VR | GNL    |
| <i>Cryptosporidium hominis-nbp35</i>   | SSQISWCLS     | CG | SKFFNVGLLD       | I  | DICG       | SP    | APKMM     | VN | DNL    |
| <i>Tetrahymena thermophila-nbp35</i>   | SSQLAFYLA     | CG | NLGYEVGLLD       | I  | DICG       | SP    | PRML      | VE | DNL    |
| <i>Metallospira cuprina</i>            | SSNLAMALA     | CG | AAGKSVGI         | I  | DVDFH      | GP    | SVKML     | GP | FGI    |
| <i>Pyrococcus furiosus</i>             | AVNLTAALA     | CG | KMGYFVGI         | L  | DADIH      | GP    | NVAKMF    | VD | FMG    |
| <i>Methanococcus maripaludis</i>       | TVNLAATLN     | CG | MMGYKVG          | V  | LDGD       | I     | HGPNIPQML | TP | QGK    |
| <i>Homo sapiens-cfd1</i>               | STELALALR     | CG | HAGKKG           | V  | GLD        | V     | DICG      | LD | REQ    |
| <i>Saccharomyces cerevisiae-cfd1</i>   | TTQTALTL      | CG | SMGFK            | V  | GLD        | I     | DITG      | VE | TNST   |
| <i>Dictyostelium purpureum-cfd1</i>    | SSQLAFYLA     | CG | HTGNK            | V  | GLLD       | V     | DICG      | TD | ETQ    |
| <i>Entamoeba dispar-cfd1</i>           | ATALARSFA     | CG | LVGKKT           | G  | I          | DICG  | SP        | SQ | IGD    |
| <i>Naegleria gruberi-cfd1</i>          | SCQLALTLA     | CG | NMKYK            | V  | GLD        | V     | DICG      | VE | DEL    |
| <i>Guillardia theta-cfd1</i>           | ATGIAISLS     | CG | EEGK             | V  | GLD        | V     | DICG      | TD | GEN    |
| <i>Encephalitozoon cuniculi-cfd1</i>   | SIMLSTVLS     | CG | EKG              | R  | L          | L     | D         | VS | KNL    |
| <i>Trypanosoma vivax-cfd1</i>          | ACQLALALA     | CG | FKHGK            | V  | GLLD       | V     | DICG      | CG | GLT    |

|                                        | Mrp family Signature |   |   |                                                                                                   |
|----------------------------------------|----------------------|---|---|---------------------------------------------------------------------------------------------------|
| <i>Homo sapiens-nbp35</i>              | QFLRDVDN             | C | V | VDYLVVDTPPGTSEHLSVVRVYLAH-I-----DGAVIITTPQEVSLQDVRKEINFCRKVKLP IIGVVENMS--GF-----                 |
| <i>Saccharomyces cerevisiae-nbp35</i>  | KFLKDVDN             | D | L | LDYLVVDTPPGTSEHIS INKYMRESG-I-----DGALVVTT PQEVALDVRKEIDFCRKAGINILGLVENMS--GF-----                |
| <i>Dictyostelium purpureum-nbp35</i>   | QFLKDVMN             | N | L | LDYLVVDTPPGTSEHLS IVQYKTSN-I-----DGAVIITSPQDVALIDVRKEINFCRKVGVP IIGVVENMS--GF-----                |
| <i>Entamoeba dispar-nbp35</i>          | QFLHDVEM             | C | L | LDYLVVDTPPGTSEHLS IVSILTKSN-V-----DGAIIVTTPQDVSLIDVRKEINFCKKIGLPI IIGVVENMS--GF-----              |
| <i>Naegleria gruberi-nbp35</i>         | QFLRDVMN             | C | L | LDYLVVDTPPGTSEHIS IVQYKLVND-I-----DGAIIVTTPQDVSCNDVRRINFCRKVGVP IIGI IENMS--GF-----               |
| <i>Guillardia theta-nbp35</i>          | QFLKDVNM             | C | L | LDYLVVDAPPGTSEHITIAQCLNQTS-N-----VGAVIVTTPQEVALDVRKEINFCRKAGVKILGV IENMA--GF-----                 |
| <i>Encephalitozoon cuniculi-nbp35</i>  | KLLKWCXY             | E | T | TDVLLLDTPPNVTDEHLMGNVFIRP-----RFGIVVTT PQKFSLQDVARQVDFCRKARIEVLGI IENMK--RF-----                  |
| <i>Trypanosoma vivax</i>               | MFFKDVMN             | C | I | IDIMLIDTPPGTSEHITASSLLQCCGGV-----TGAIIVTTPQLVAEADVRREVNFCQKAKIP IIGI IENMS--SF-----               |
| <i>Giardia lamblia-nbp35</i>           | NFLKDVHM             | F | D | SEKI DNYLII DTPPGTSEHLSVINMLSAAMRVLNKEKETDPSVHTPTFFAVVSTPQEVALADVRKEINFCQKIKVDVKGV IENMS--GF----- |
| <i>Blastocystis-nbp35</i>              | QFLSEINM             | C | L | LDYLVVDTPPGTSEHIS IVNFLRDVG-I-----DGAVIVTTPQEVALSDVRKEIRFCQKQSGIRI IIGI IENMSEVNF-----            |
| <i>Blastocystis sp. NandII-nbp35</i>   | QFLSEINM             | C | L | LDYLVVDTPPGTSEHIS IVNFLRDVG-I-----DGAVIVTTPQEVALSDVRKEIRFCQKQSGIRI IIGI IENMSEVNF-----            |
| <i>Phytophthora infestans-nbp35</i>    | QFLVDVQN             | C | L | LDYLVVDTPPGTSEHIS IVQYMKDAD-I-----DGAVVVTT PQEVALSDVRKELNFCRKTNINVLGVVENMS--GV-----               |
| <i>Phaeodactylum tricornutum-nbp35</i> | QFLTEVDWTGDT         | C | X | LDYLVVDTPPGTSEHIS IVQYKASAV-----SGAVVVTT PEEVSLADVRKELSFCKRTDVPVGLGI IENMG--SYQTRLRQMEFSKD        |
| <i>Arabidopsis thaliana-nbp35</i>      | QFLKDVMN             | C | L | LDYLVVDAPPGTSEHIS IVQYLLPTG-I-----DGAIIVTTPQEVSLIDVRKEVFCRKVGVPVGLGVVENMS--GL-----                |
| <i>Micromonas sp.-nbp35</i>            | QFLKDTVM             | C | L | LDYLVVDAPPGTSEHLSVQVHMKLAG-I-----DGAIIVTTPQEMALADVRKEINFCRKVGINILGVVENMS--GL-----                 |
| <i>Cyanidioschyzon merolae-nbp35</i>   | QFLRDVDN             | C | L | LDYLVVDTPPGTSEHITLTQALAGIA-N-----TAALIVATPQEVALLDVRKQVRFCEKAGVPIVGV IENMS--YY-----                |
| <i>Cryptosporidium hominis-nbp35</i>   | QFLSDVMN             | C | L | LDYLVVDTPPGTSEHLS IVSVLNLSN-V-----NGALIVTTPQEVSLQDVRKEINFCRKVGINILGVVENMG-----                    |
| <i>Tetrahymena thermophila-nbp35</i>   | QFLTDVMN             | C | L | LDYLVVDTPPGTSEHIS CVQYLPQGE-G-----DGAVIVTTPQEVSLQDVRKELSFCKQKTKTNILGVVENMS--GF-----               |
| <i>Metallosphaera cuprina</i>          | QFLGDVMN             | C | L | LDYLVVDTPPGTSEHMAISVAQVLPN--I-----TGFIIVTTPQEVSLADVRKELSFCKRTDVPVGLGI IENMG--YF-----              |
| <i>Pyrococcus furiosus</i>             | QLLGDVMN             | C | L | LDYLVVDTPPGTSEHIS IVQYKASAV-----DAAVIVTTPQEVALLDVGKAVNMMKKMEVPI IAV IENMS--YL-----                |
| <i>Methanococcus maripaludis</i>       | QFLSDVMN             | C | L | LDYLVVDTPPGTSEHIS IVQYKASAV-----DGAVIVTTPQEVSLADVRKELSFCKRTDVPVGLGI IENMG--YF-----                |
| <i>Homo sapiens-cfd1</i>               | QFVSDVAN             | C | L | LDYLVVDTPPGTSEHMAISVAQVLPN--I-----LQALIVATPQEVALLDVRKQVRFCEKAGVPIVGV IENMS--YY-----               |
| <i>Saccharomyces cerevisiae-cfd1</i>   | QFISDVAN             | C | L | LDYLVVDTPPGTSEHIS IVQYKASAV-----DGAIIVTTPQEVSLADVRKELSFCKRTDVPVGLGI IENMG--YF-----                |
| <i>Dictyostelium purpureum-cfd1</i>    | QFIDVVMN             | C | L | LDYLVVDTPPGTSEHIS IVQYKASAV-----DGAIIVTTPQEVSLADVRKELSFCKRTDVPVGLGI IENMG--YF-----                |
| <i>Entamoeba dispar-cfd1</i>           | QFLNDVEM             | C | L | LDYLVVDTPPGTSEHIS IVQYKASAV-----DGAIIVTTPQEVSLADVRKELSFCKRTDVPVGLGI IENMG--YF-----                |
| <i>Naegleria gruberi-cfd1</i>          | QFIQDVCM             | K | L | LDYLVVDTPPGTSEHIS IVQYKASAV-----DGAIIVTTPQEVSLADVRKELSFCKRTDVPVGLGI IENMG--YF-----                |
| <i>Guillardia theta-cfd1</i>           | QFFTVMN              | C | L | LDYLVVDTPPGTSEHIS IVQYKASAV-----DGAIIVTTPQEVSLADVRKELSFCKRTDVPVGLGI IENMG--YF-----                |
| <i>Encephalitozoon cuniculi-cfd1</i>   | MFYESID              | D | L | LDYLVVDTPPGTSEHIS IVQYKASAV-----DGAIIVTTPQEVSLADVRKELSFCKRTDVPVGLGI IENMG--YF-----                |
| <i>Trypanosoma vivax-cfd1</i>          | QFISDVNM             | C | L | LDYLVVDTPPGTSEHIS IVQYKASAV-----DGAIIVTTPQEVSLADVRKELSFCKRTDVPVGLGI IENMG--YF-----                |

|                                        | C-terminal CPXC motif |                             |                                                                          |                                                          |
|----------------------------------------|-----------------------|-----------------------------|--------------------------------------------------------------------------|----------------------------------------------------------|
| <i>Homo sapiens-nbp35</i>              | -----I                | CP                          | KCKKE                                                                    | -----SQIFPP--TTG-----GAEMLCQD                            |
| <i>Saccharomyces cerevisiae-nbp35</i>  | -----V                | CP                          | NCKGE                                                                    | -----SQIFKA--TTG-----GGEALCKE                            |
| <i>Dictyostelium purpureum-nbp35</i>   | -----V                | CP                          | KCNKE                                                                    | -----SQIFIP--TTG-----GAEQMSKD                            |
| <i>Entamoeba dispar-nbp35</i>          | -----V                | CP                          | CKHKE                                                                    | -----STIFPP--TNG-----GAQKMCCE                            |
| <i>Naegleria gruberi-nbp35</i>         | -----V                | CP                          | NCKNK                                                                    | -----AMIFKP--TSG-----GGQQLAID                            |
| <i>Guillardia theta-nbp35</i>          | -----V                | CP                          | HCGNS                                                                    | -----SEIFVP--SEADSVQGPSAVLRGAEMAKK                       |
| <i>Encephalitozoon cuniculi-nbp35</i>  | -----T                | CP                          | KCGHS                                                                    | -----KSIFF--RSV-----GVESYCMS                             |
| <i>Trypanosoma vivax</i>               | -----V                | CP                          | GCCKS                                                                    | -----SVIFPSAGSCG-----AGERLSAE                            |
| <i>Giardia lamblia-nbp35</i>           | -----V                | CP                          | CCKNE                                                                    | -----TQIFNP--SSG-----GVKQLCAD                            |
| <i>Blastocystis-nbp35</i>              | -----E                | MT                          | ECRYR                                                                    | -----DYFGNDITDAVAKLNEAFPEFAHLIGSICIFPP--SNN-----GGEGLAQW |
| <i>Blastocystis sp. NandII-nbp35</i>   | -----E                | MT                          | ECRYR                                                                    | -----DYFGNDITDAVAKLNEAFPEFAHLIGSICIFPP--SNN-----GGEGLAQW |
| <i>Phytophthora infestans-nbp35</i>    | -----Q                | RPLSDVKFVGA                 | DGNDE                                                                    | -----TSAFMKLLQEKAPPELLKHSVQMEVFFPA--STG-----GGEAMAKK     |
| <i>Phaeodactylum tricornutum-nbp35</i> | GQDCTAQMLAVLREK       | CP                          | EVLDVAA                                                                  | -----SNLFSV--NAG-----GAEQMATD                            |
| <i>Arabidopsis thaliana-nbp35</i>      | -----S                | QLPKDVKFMKLATETGSSINVTEDVIA | CLRNAP                                                                   | -----ELLDIVACSEVFDS--SGG-----GAERMCRE                    |
| <i>Micromonas sp.-nbp35</i>            | -----N                | LP                          | NCAQVMFTSAENGSDITLKRDAIQKPNPSGFTASSANVHFEPSIRIQIDVFFPA--SRG-----GALMKCFE |                                                          |
| <i>Cyanidioschyzon merolae-nbp35</i>   | -----T                | CR                          | HCGHQ                                                                    | -----EEIFTP--TTG-----GVQALCND                            |
| <i>Cryptosporidium hominis-nbp35</i>   | -----I                | CP                          | GCKCE                                                                    | -----MIFKNAEHS-----SVKDMCDN                              |
| <i>Tetrahymena thermophila-nbp35</i>   | -----V                | CP                          | SESKN                                                                    | -----SQIFPP--VTG-----GAARKCQD                            |
| <i>Metallosphaera cuprina</i>          | -----V                | CP                          | SESKN                                                                    | -----YYIF--GQD-----KGGKMAEE                              |
| <i>Pyrococcus furiosus</i>             | -----I                | CP                          | HCGNK                                                                    | -----IDIF--GEG-----GGEKLAEK                              |
| <i>Methanococcus maripaludis</i>       | -----V                | CP                          | ECDKV                                                                    | -----IDIF--GKG-----GGEKAAKE                              |
| <i>Homo sapiens-cfd1</i>               | -----T                | CP                          | HCTEC                                                                    | -----TSVF--SRG-----GGELAQL                               |
| <i>Saccharomyces cerevisiae-cfd1</i>   | -----V                | CP                          | HCAEC                                                                    | -----TNIF--SSG-----GGKRLSEQ                              |
| <i>Dictyostelium purpureum-cfd1</i>    | -----V                | CP                          | HCEC                                                                     | -----TNIF--SSE-----GGKLLAEQ                              |
| <i>Entamoeba dispar-cfd1</i>           | -----L                | CP                          | HCASTV                                                                   | -----TNIF--SSN-----GGKELADK                              |
| <i>Naegleria gruberi-cfd1</i>          | -----V                | CP                          | CKKEI                                                                    | -----TFIF--GSG-----GGQKLSNE                              |
| <i>Guillardia theta-cfd1</i>           | -----Q                | CP                          | CGEV                                                                     | -----TDIF--SRG-----GGEKLAIE                              |
| <i>Encephalitozoon cuniculi-cfd1</i>   | -----C                | CP                          | CGSS                                                                     | -----VNIFF--GSK-----GGERLAEE                             |
| <i>Trypanosoma vivax-cfd1</i>          | -----V                | CP                          | HCAHC                                                                    | -----TDIF--STG-----GGRKLAEM                              |

*Homo sapiens-nbp35* LEVPLLRVPLDPLIGKNCCKGQS---FFIDAPDS-----PATLAYRSIIQRIQEF----CNLHQSKREENLISS  
*Saccharomyces cerevisiae-nbp35* LGIKFLGSLDPRIGKSCDMGES---FLDNYPDS-----PASSAVLNVVEALRDA----VGDV-----  
*Dictyostelium purpureum-nbp35* MNVPFLGRIPIDPLIARSCDEGKS---YLISHPDS-----EATKQYNIVFNSKYRY----RKKKKTTNY----  
*Entamoeba dispar-nbp35* MSVKFLGRIPLDPVIARSCDVGPS---YFIEHPDA-----DATKSFKEIYKQIIAN---I-----  
*Naegleria gruberi-nbp35* YEIPFLGSIPLDPMVMQSCETGKS---IVKDHPE-----PASQAMKEIVQKIITH----KKNQ-----  
*Guillardia theta-nbp35* HGIPFLGRIPLDPKLGIASERGEA-----LKN-----LALQSLQSAVQNLRLN----CKGNT-----  
*Encephalitozoon cuniculi-nbp35* NGIAYLGSIDLKQDIARSDSGDT---IEEE-----VLGKIVDAIMVV---CSSKA-----  
*Trypanosoma vivax* FGIPLWGKIPLDQRLMKACEEGVS---LVNCTDEDT-----LTLKTLKLSAKLISA----AGLE-----  
*Giardia lamblia-nbp35* YKVKFLGRVPLDPQLTKASESGQA---WKKAVEEG-----TVSKGMEFMFYEVVVKGI----LSE-----  
*Blastocystis-nbp35* ANVPFLGRIPIFTSLEKAGEMGQG-----APAIAGGHVFFVVVSKIVNGMARR-----  
*Blastocystis sp. NandII-nbp35* ANVPFLGRIPIFTSLEKAGEMGQG-----APAIAGGHVFFVVVSKIVN-----  
*Phytophthora infestans-nbp35* FNVFPLGRPLDNDKMTGACEEGVS---FLEEYPDS-----VAAPAFGKIVQDLVAA----VEK-----  
*Phaeodactylum tricornutum-nbp35* YGVFFMGRPLDPELLKACEQGKS---FVQTHPNA-----NAAVALKQFARQLNKV----LPVNMDE-----  
*Arabidopsis thaliana-nbp35* MGVPFLGKVPMDPQLCKAAEQGKS---CFEDNKCL-----ISAPALKSIQKVVPS----TVMTE-----  
*Micromonas sp.-nbp35* AGVEYLGSIPLDPAIVASEKGLS---LFSKAEVSDKDLSDAPIQDFASLTSLSNSIIDALLLQ----LNEGKNR-----  
*Cyanidioschyzon merolae-nbp35* SGVRFLGRIPLDPALMRASDLGEA---ILNY--DC-----PARDAI FELARHIGKA----FSPKTIASLEVESS  
*Cryptosporidium hominis-nbp35* MEVEYLNKI PWDELLYVCDLGLS---ICEKFPQS-----PSSIGIKKLVDI IYQ----SKIN-----  
*Tetrahymena thermophila-nbp35* YKIDLLGKVPLEPKVLICTEKGKS---IVKEHPDS-----VAAKVYQHTAERTVQT----LKVELPK-----  
*Metallospira cuprina* LGVPLLGGVPLDPRIAESNDLGEF---FFLKYLD-----PASKEFLKIADEVIEQ----VENQKLSDLNLK--  
*Pyrococcus furiosus* EGVDFLGVPI DLKARASDLGIP---IVL-YGDT-----PAAKAFMEIAEKL VNK----LKEIKGDGREK--  
*Methanococcus maripaludis* LNVFPLGRIPLDIKARVASDRGVP---MVTM--DC-----KASEEFKVVNTVLER----IKKE-----  
*Homo sapiens-cfd1* AGVPFLGSLDPLMRMTLEEGHD---FIQEFPGS-----PAFAALTSIAQKILDA----TPACLP-----  
*Saccharomyces cerevisiae-cfd1* FSVPYLGNVPI DPKFVEMINQVSSKTLVEMYRES-----SLCPI FEEIMKKLRQDTTTTPVVDKHEQPQIESPK  
*Dictyostelium purpureum-cfd1* CNIKFLGKLPIDPNLSICSERGIN---YFKEYPNS-----STLSALKTFAEALNN-----  
*Entamoeba dispar-cfd1* YQLKFGVGAIPIEPKICLAGETGVN---PFADEPFA-----NALKPITDFVANLAKTFA-----  
*Naegleria gruberi-cfd1* YNIPFLGSIPIEPELANAEDNGIN---YIKNFSNS-----VTSMQFTNIVNIILN-----  
*Guillardia theta-cfd1* MGMKFLGRIPIELKWSEMDRGM---TIQGEERK-----AVMLPFKQVIHGIIASA-----  
*Encephalitozoon cuniculi-cfd1* TGIFFVCRLPIDSLLEALDEGR---FVERCGSI-----EAYMKFRKAVLGLAD-----  
*Trypanosoma vivax-cfd1* YEVEFLGAIPI DRLSLAEDNGQC---FITTSACPEGSPG-----DGVTVAVTNVINAIVNQ----AEKVLLQRSNA--

Figure S5

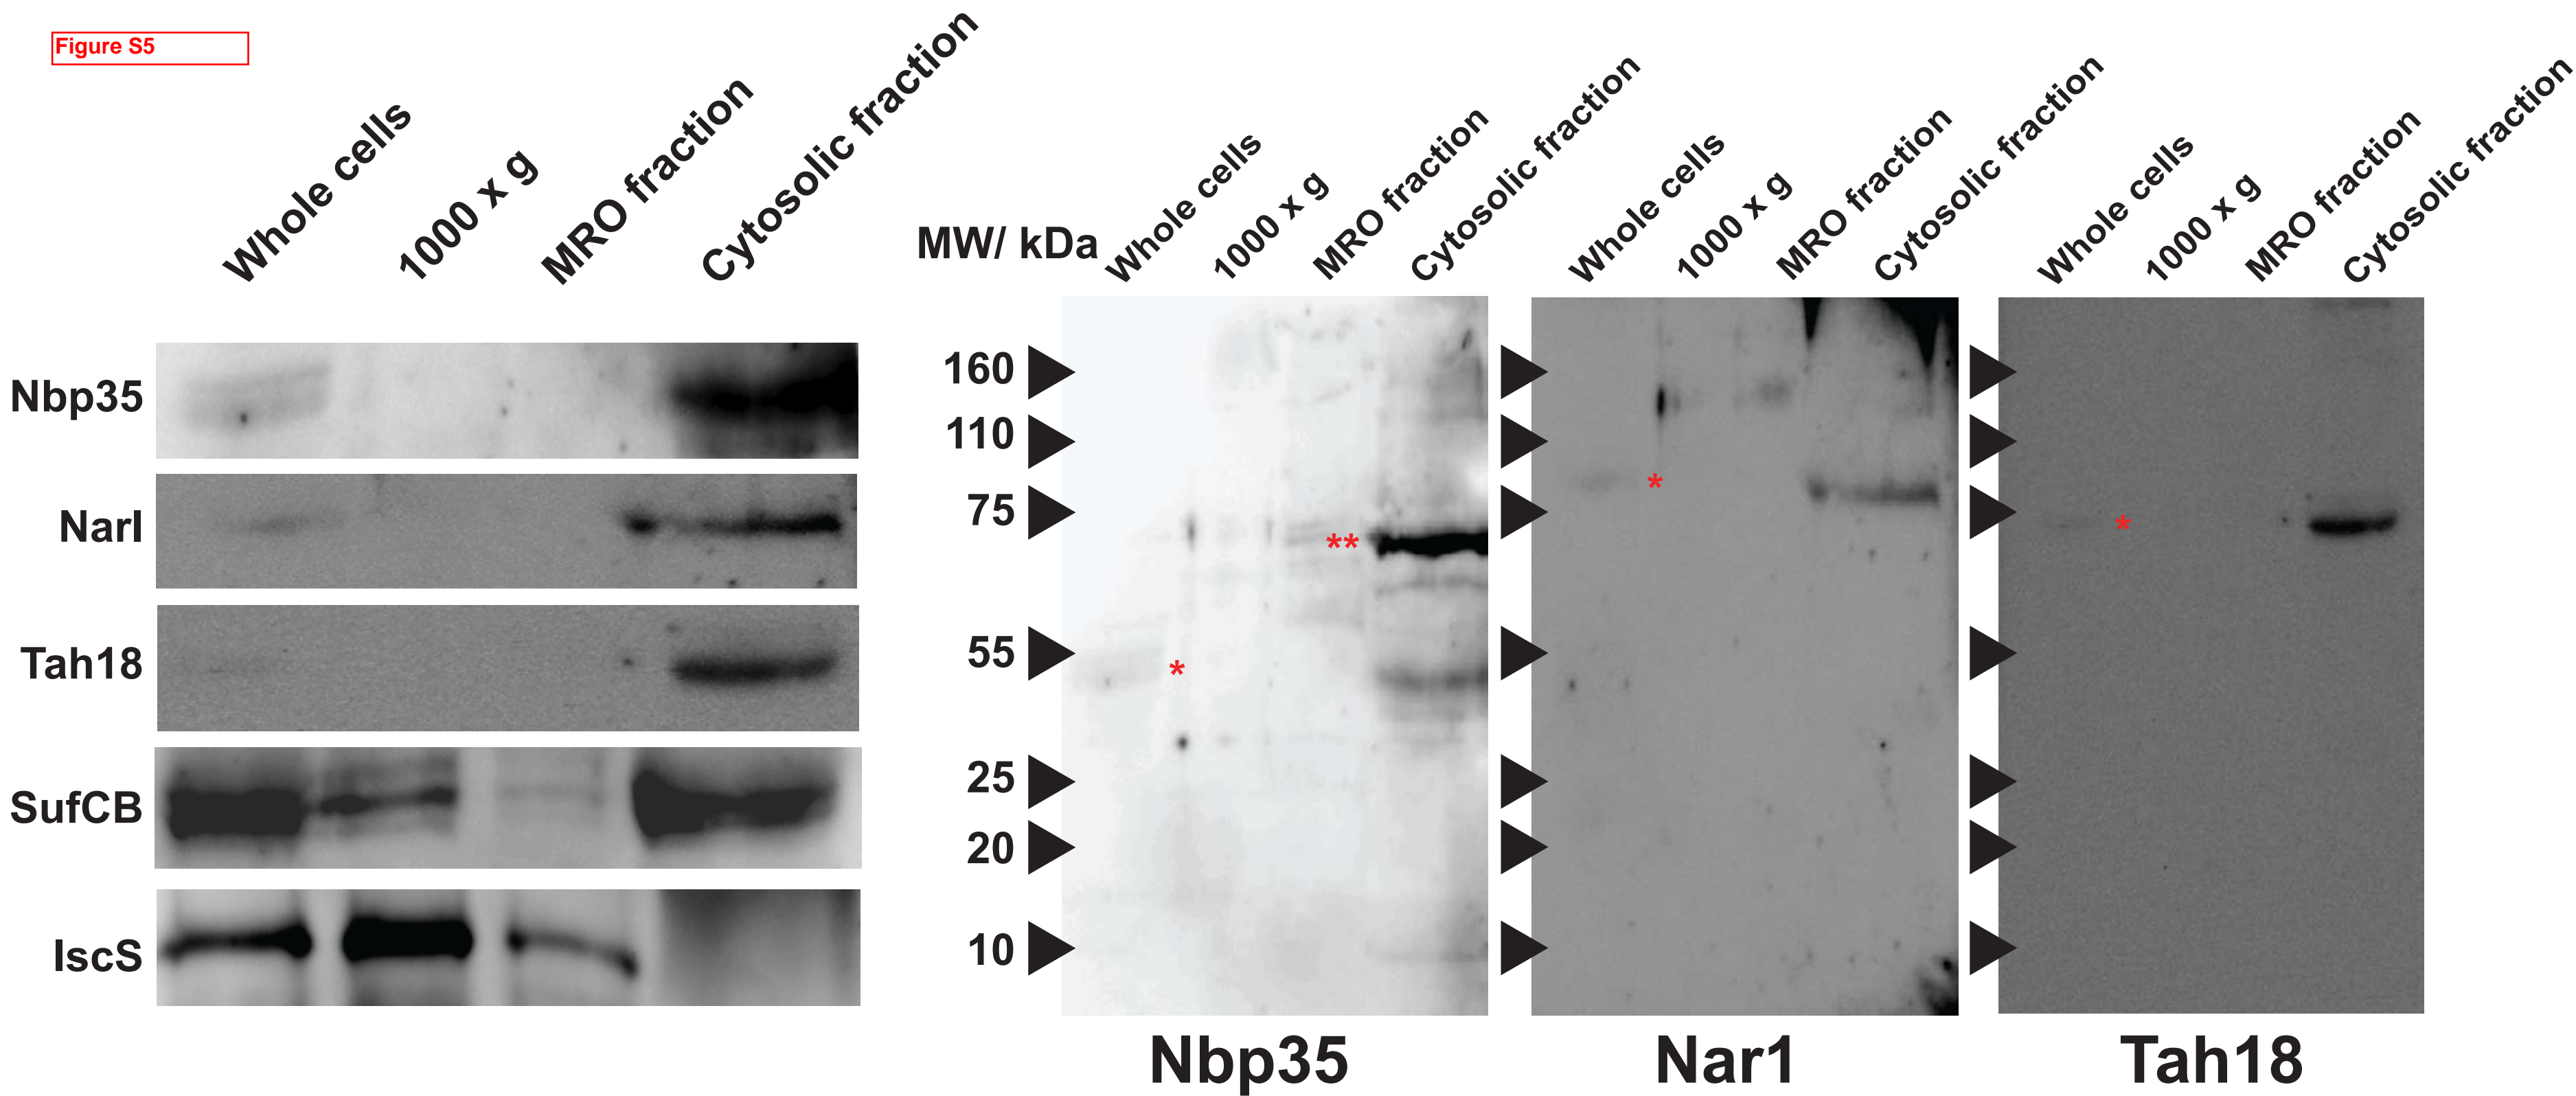

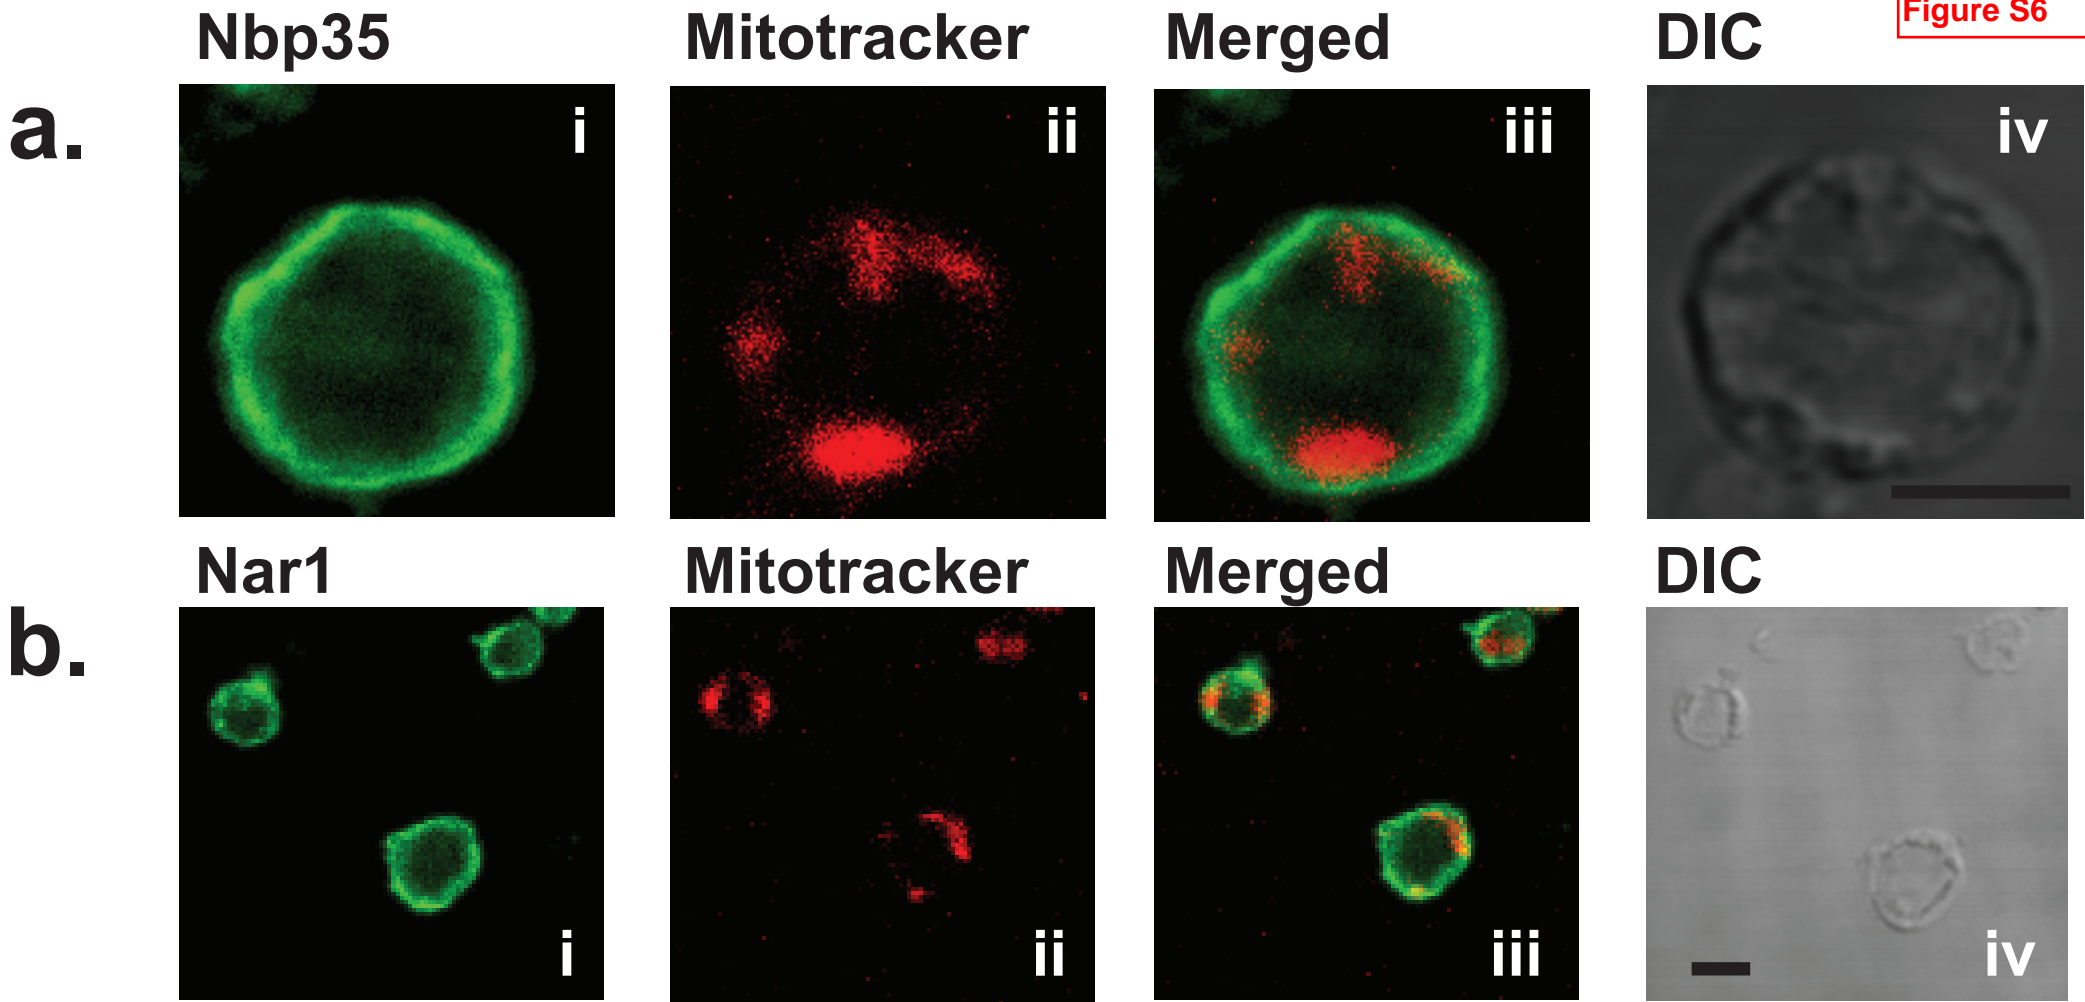

**Figure S7 - Localization of Nbp35**

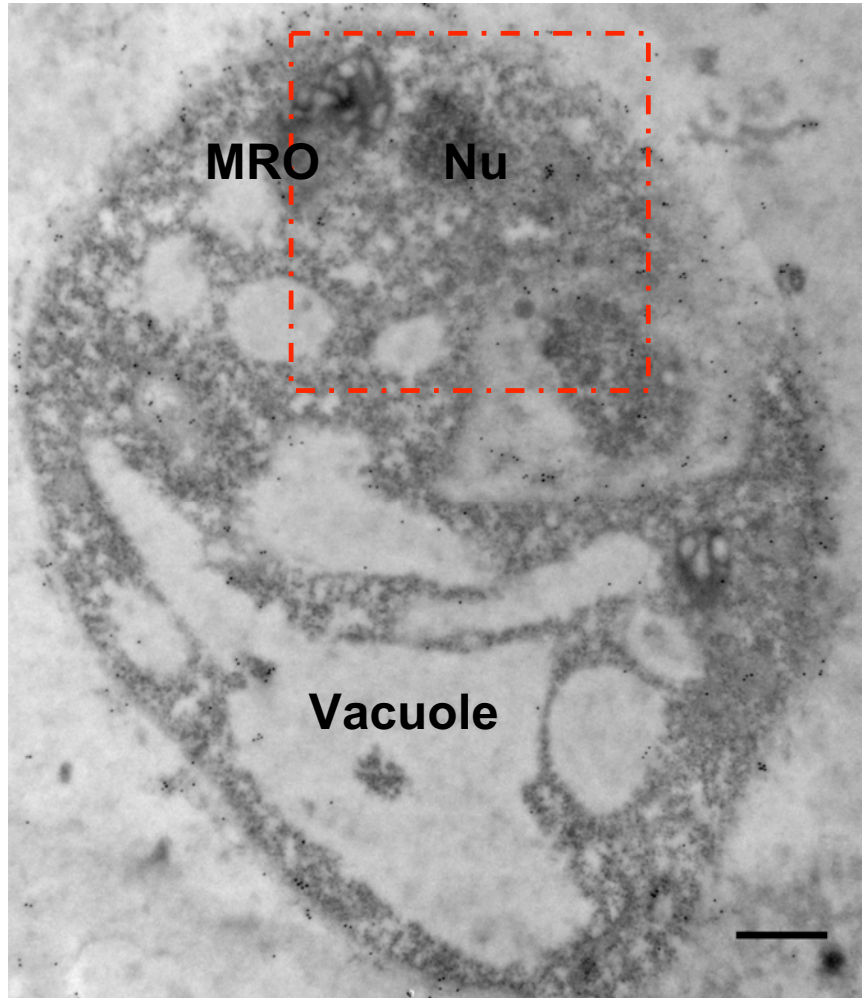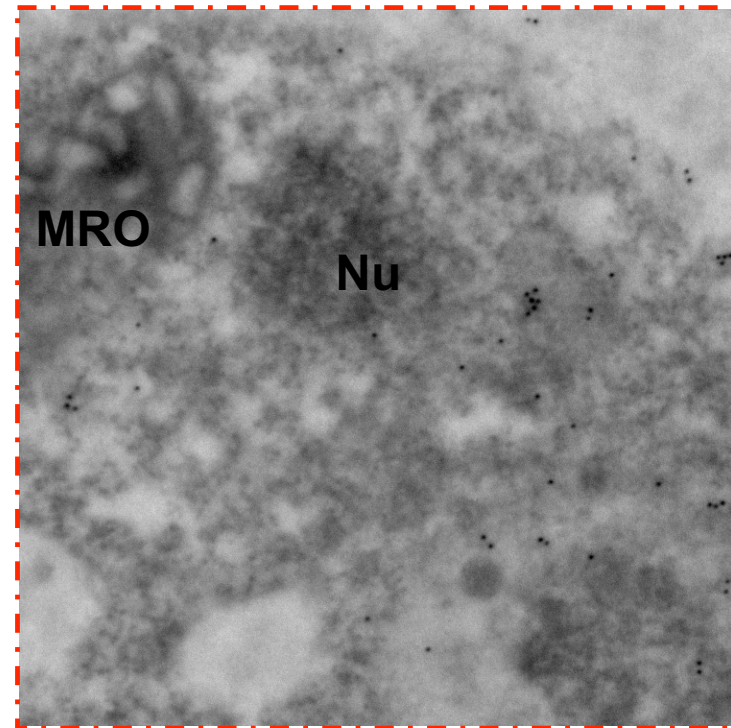



**Figure S8 - Localization of Nar1**

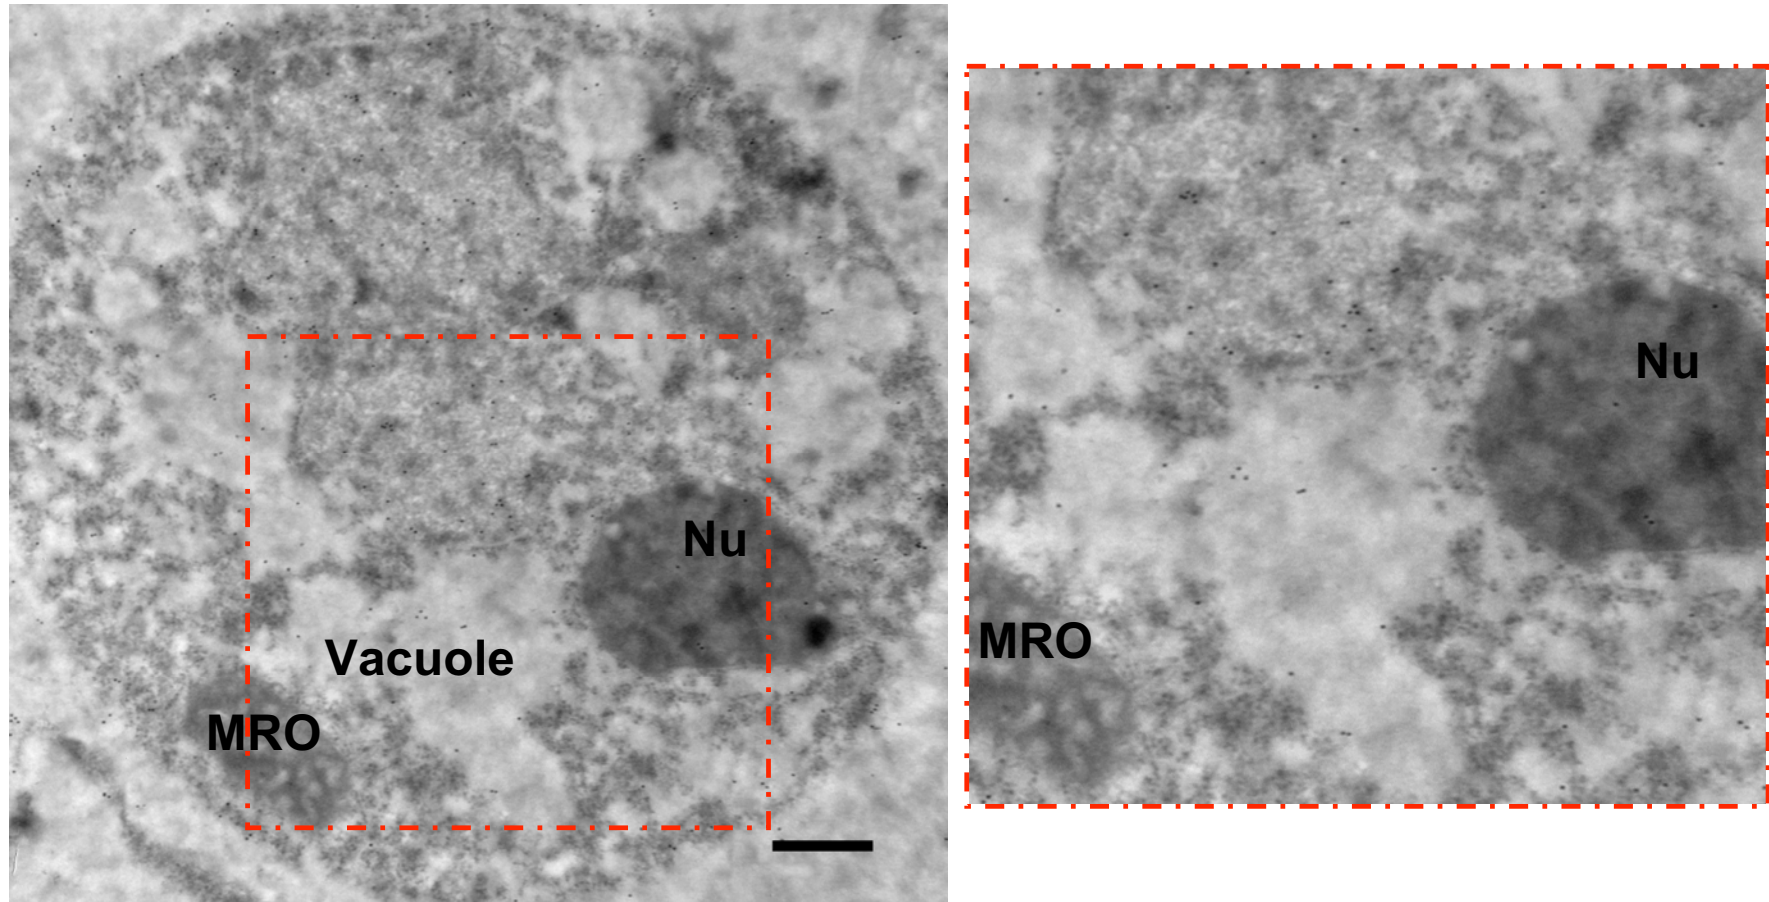

**Figure S9 - Localization of Tah18**

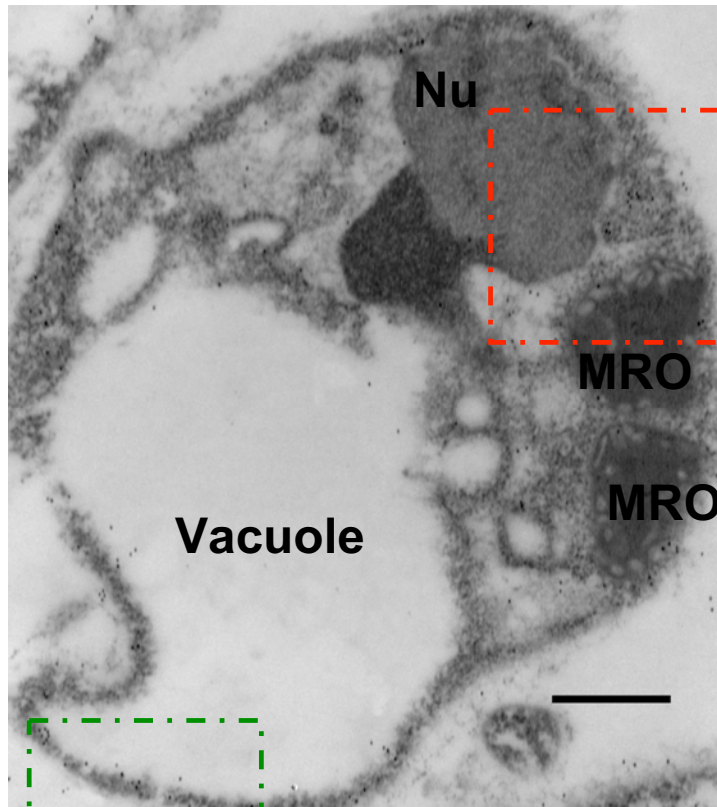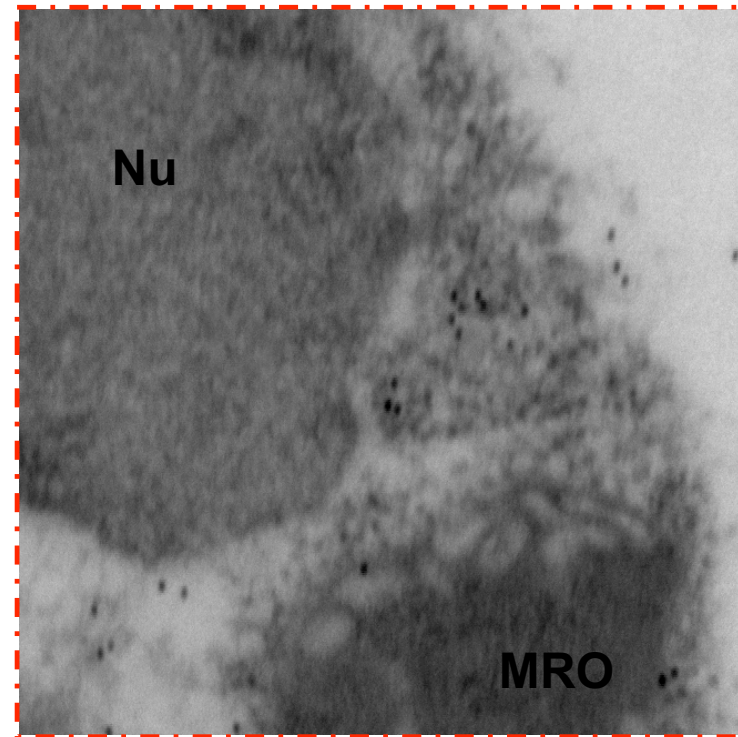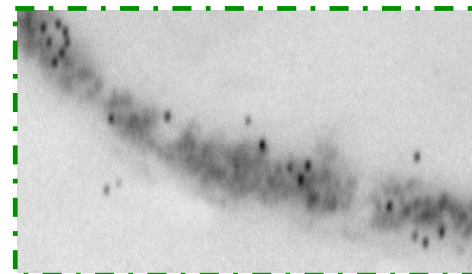

**Figure S10**

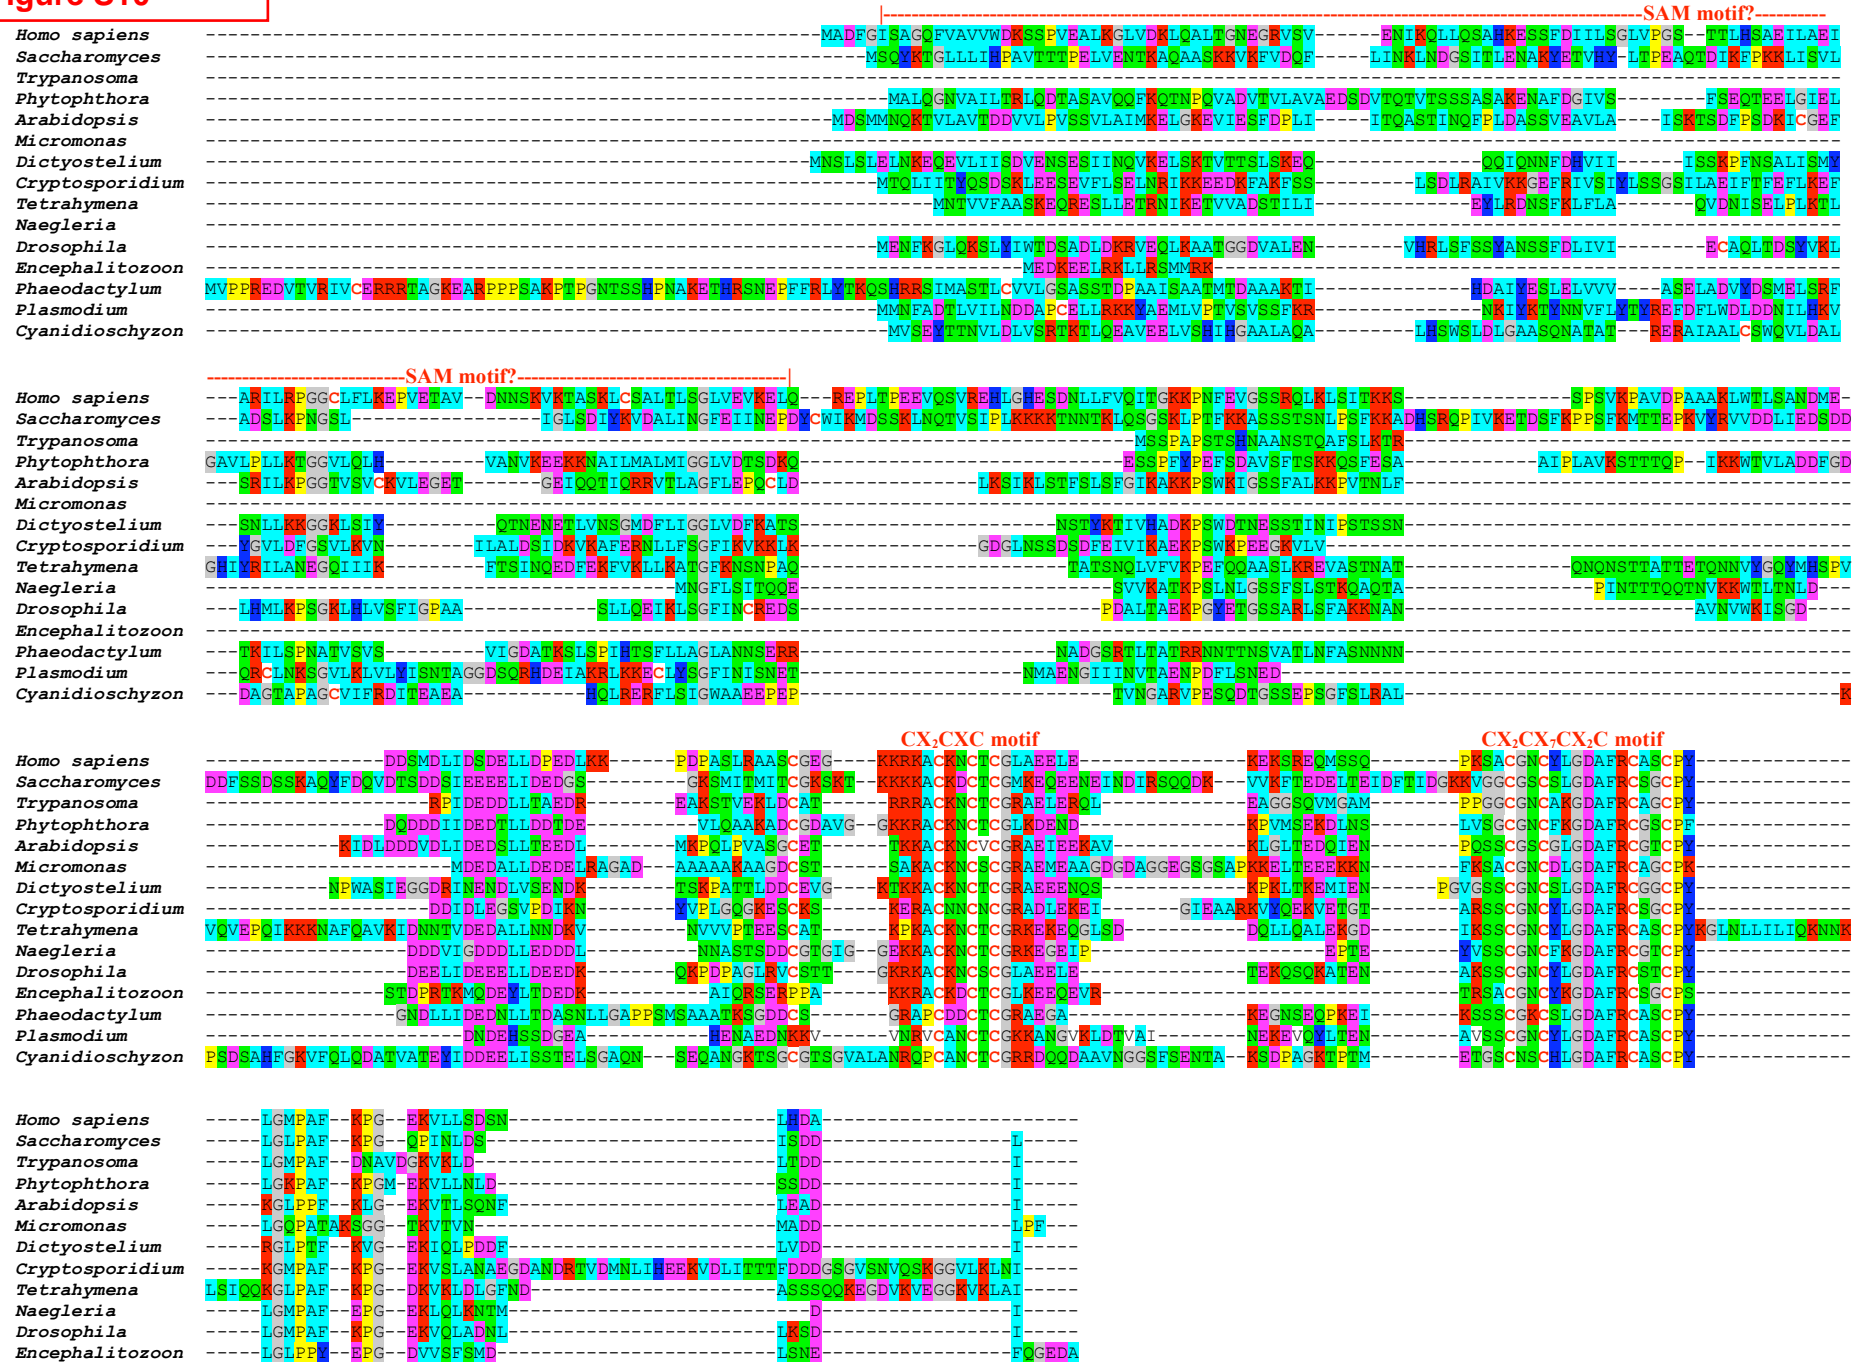

|                        |     |   |   |   |   |   |     |     |   |   |     |     |   |   |   |   |   |     |   |   |     |     |   |     |   |     |
|------------------------|-----|---|---|---|---|---|-----|-----|---|---|-----|-----|---|---|---|---|---|-----|---|---|-----|-----|---|-----|---|-----|
| <i>Phaeodactylum</i>   | --- | L | K | P | A | F | --- | K   | P | G | --- | E   | E | L | V | L | D | --- | L | O | D   | --- | F | --- |   |     |
| <i>Plasmodium</i>      | --- | K | G | L | P | A | F   | --- | C | P | G   | --- | E | N | V | R | L | N   | L | D | --- | N   | E | F   | N | --- |
| <i>Cyanidioschyzon</i> | --- | L | G | L | P | P | F   | --- | K | P | G   | --- | A | P | L | K | I | D   | A | K | --- | L   | R | G   | D | --- |

Figure S11

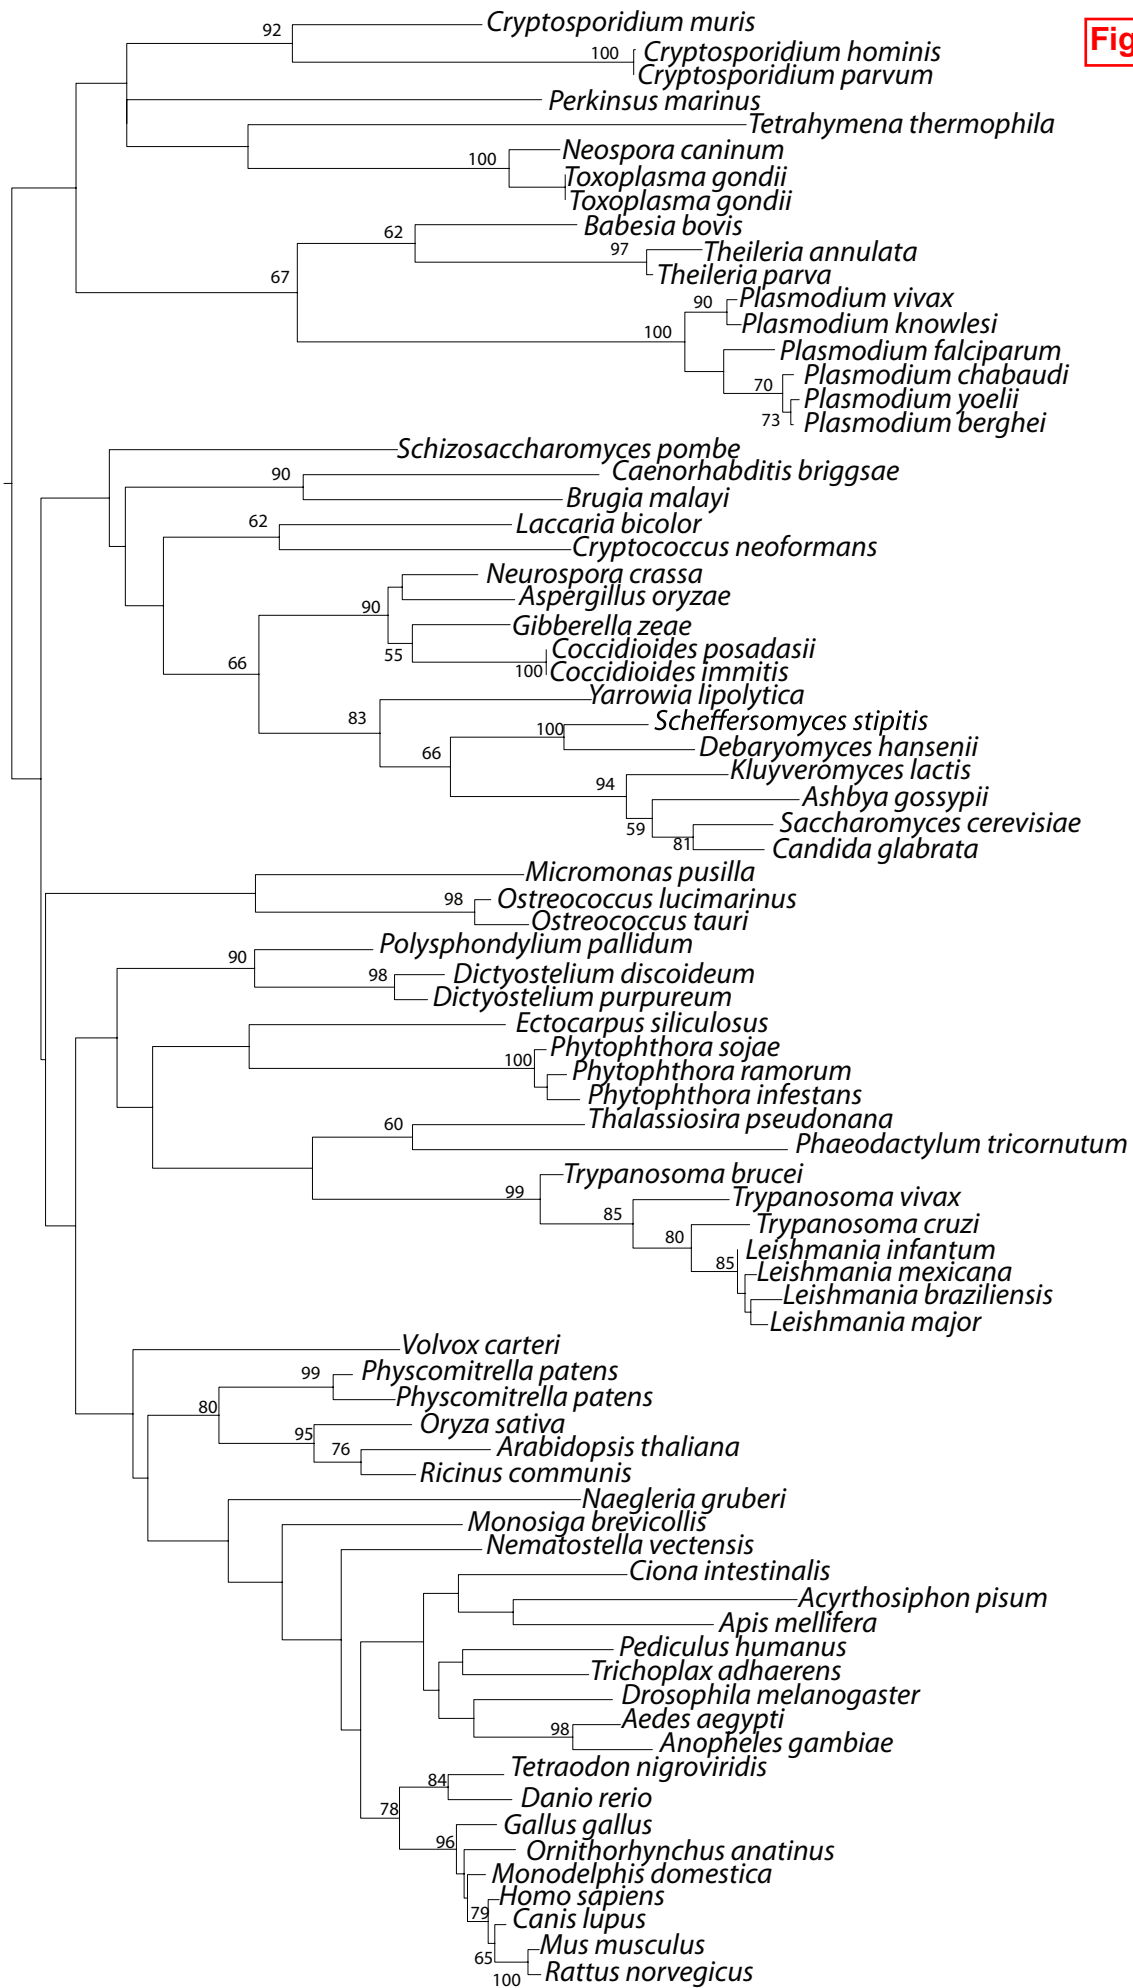

Figure S12

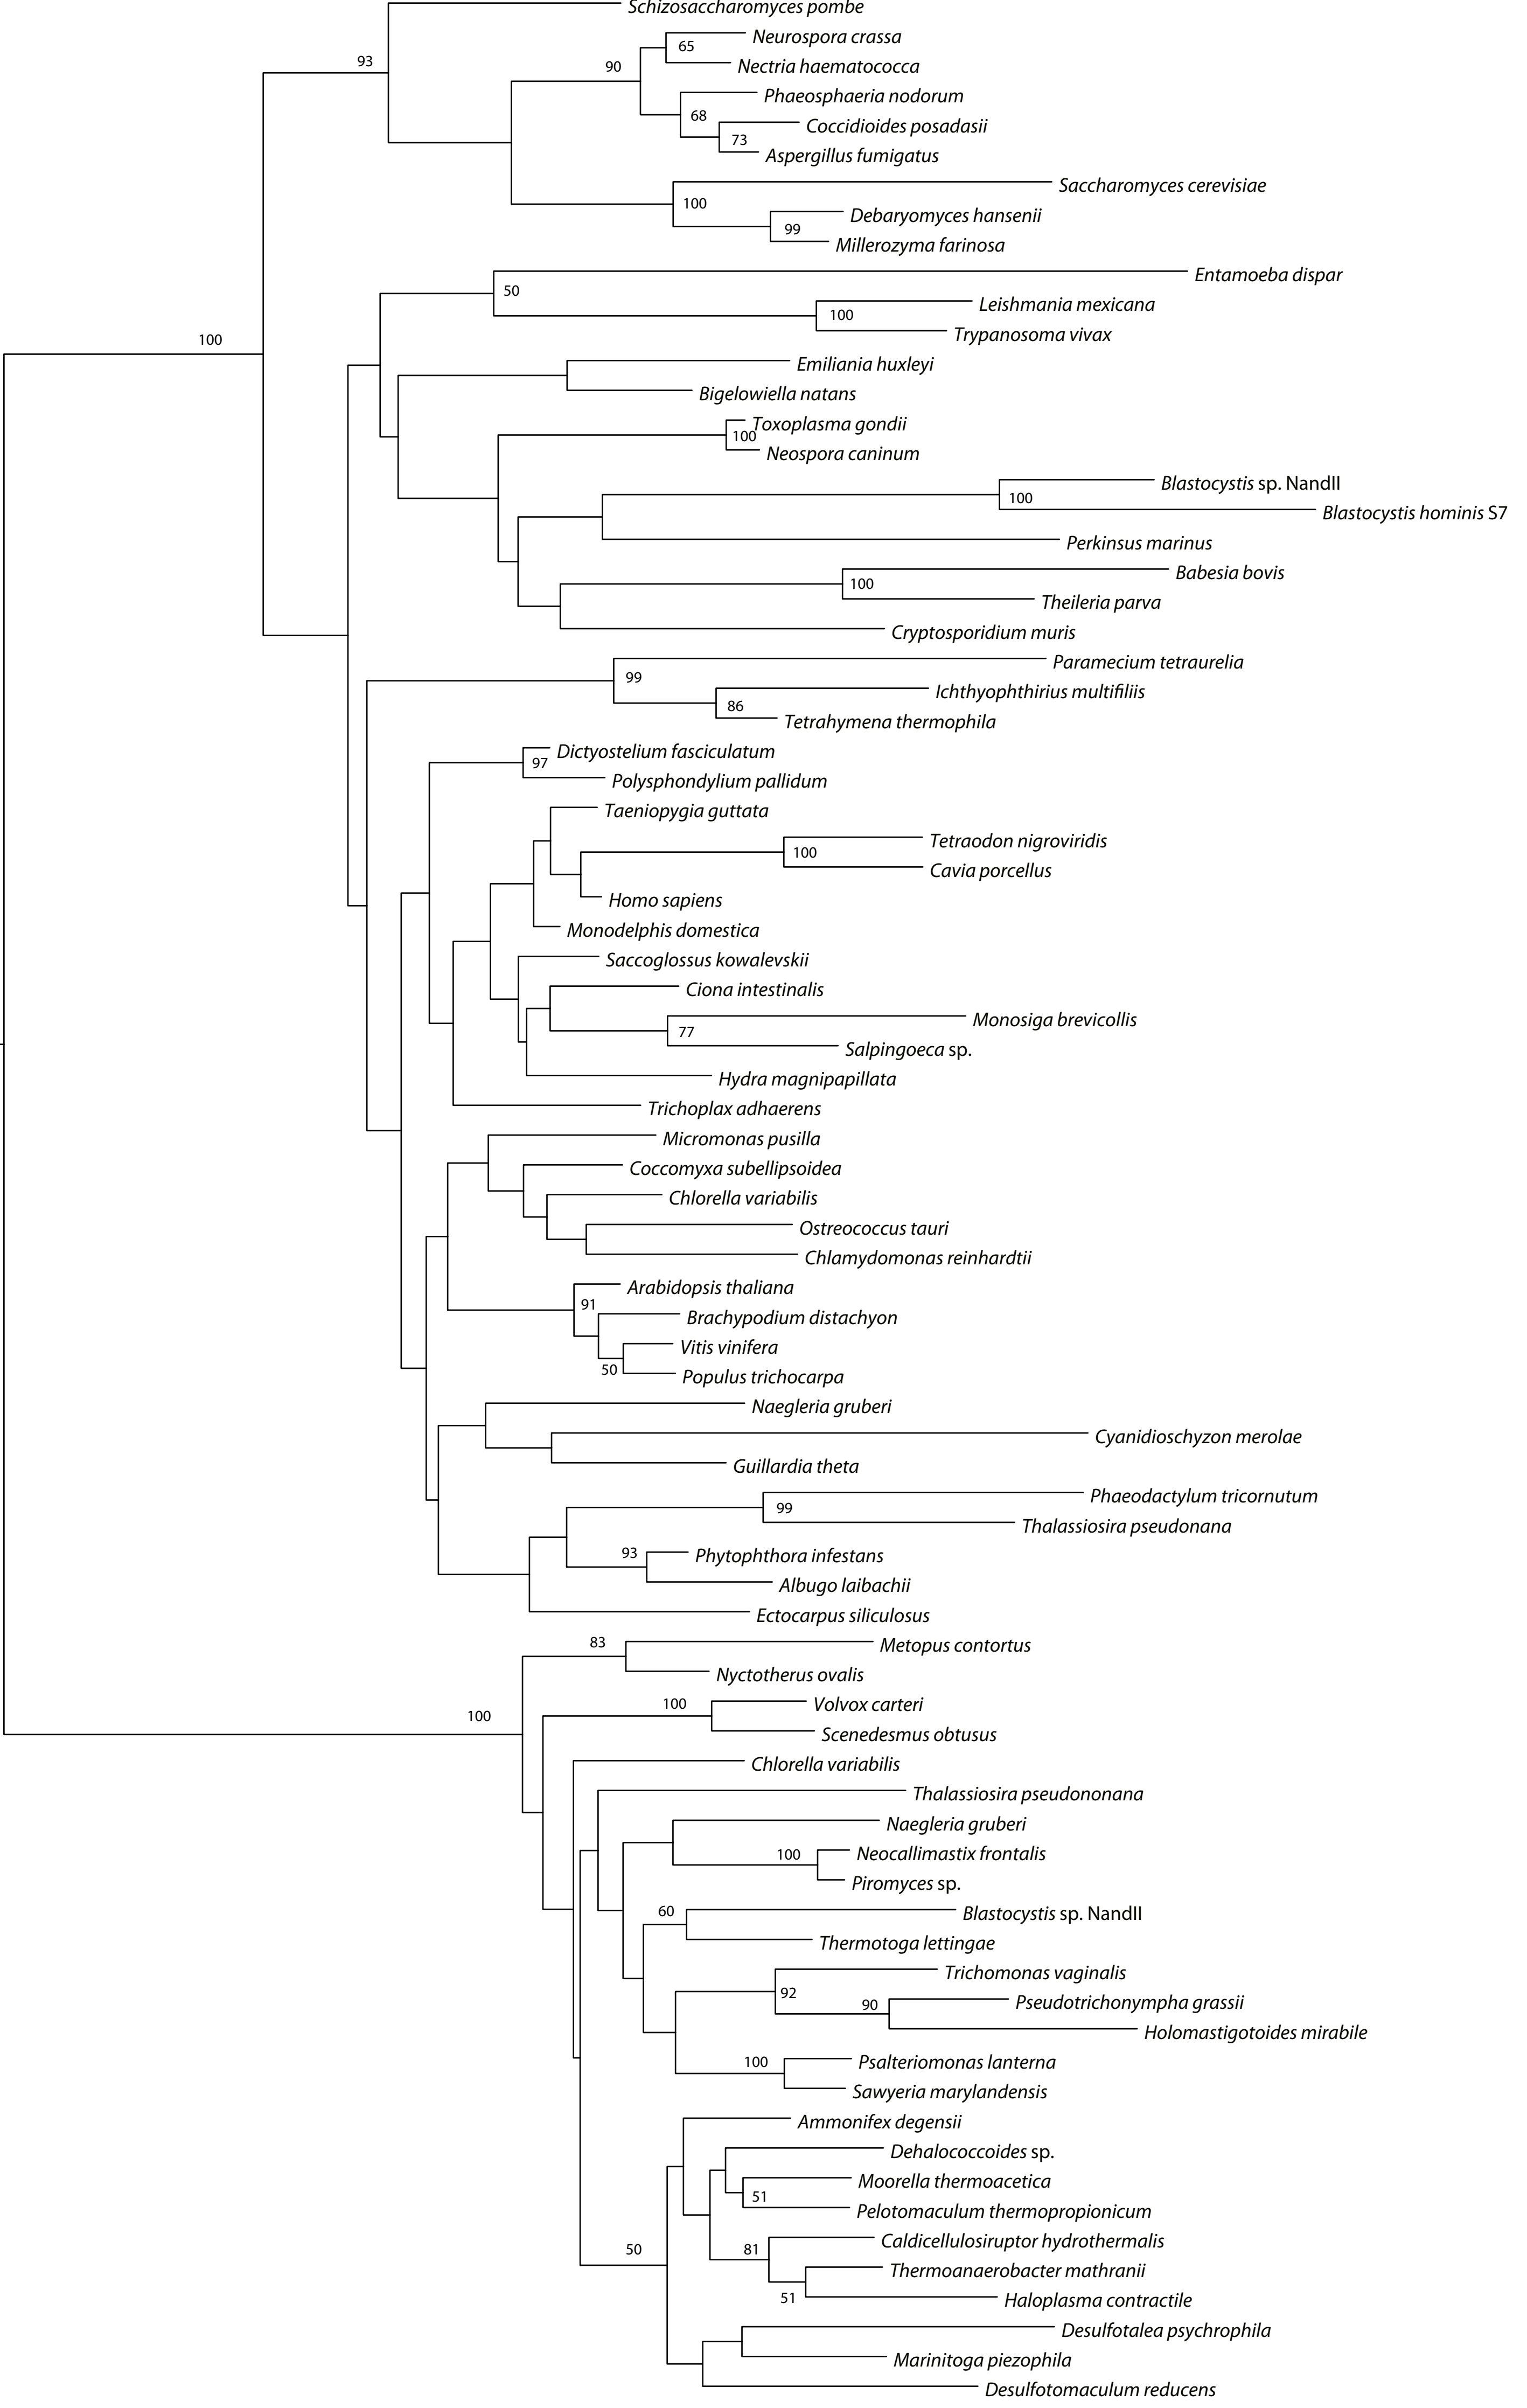

0.3

Figure S13

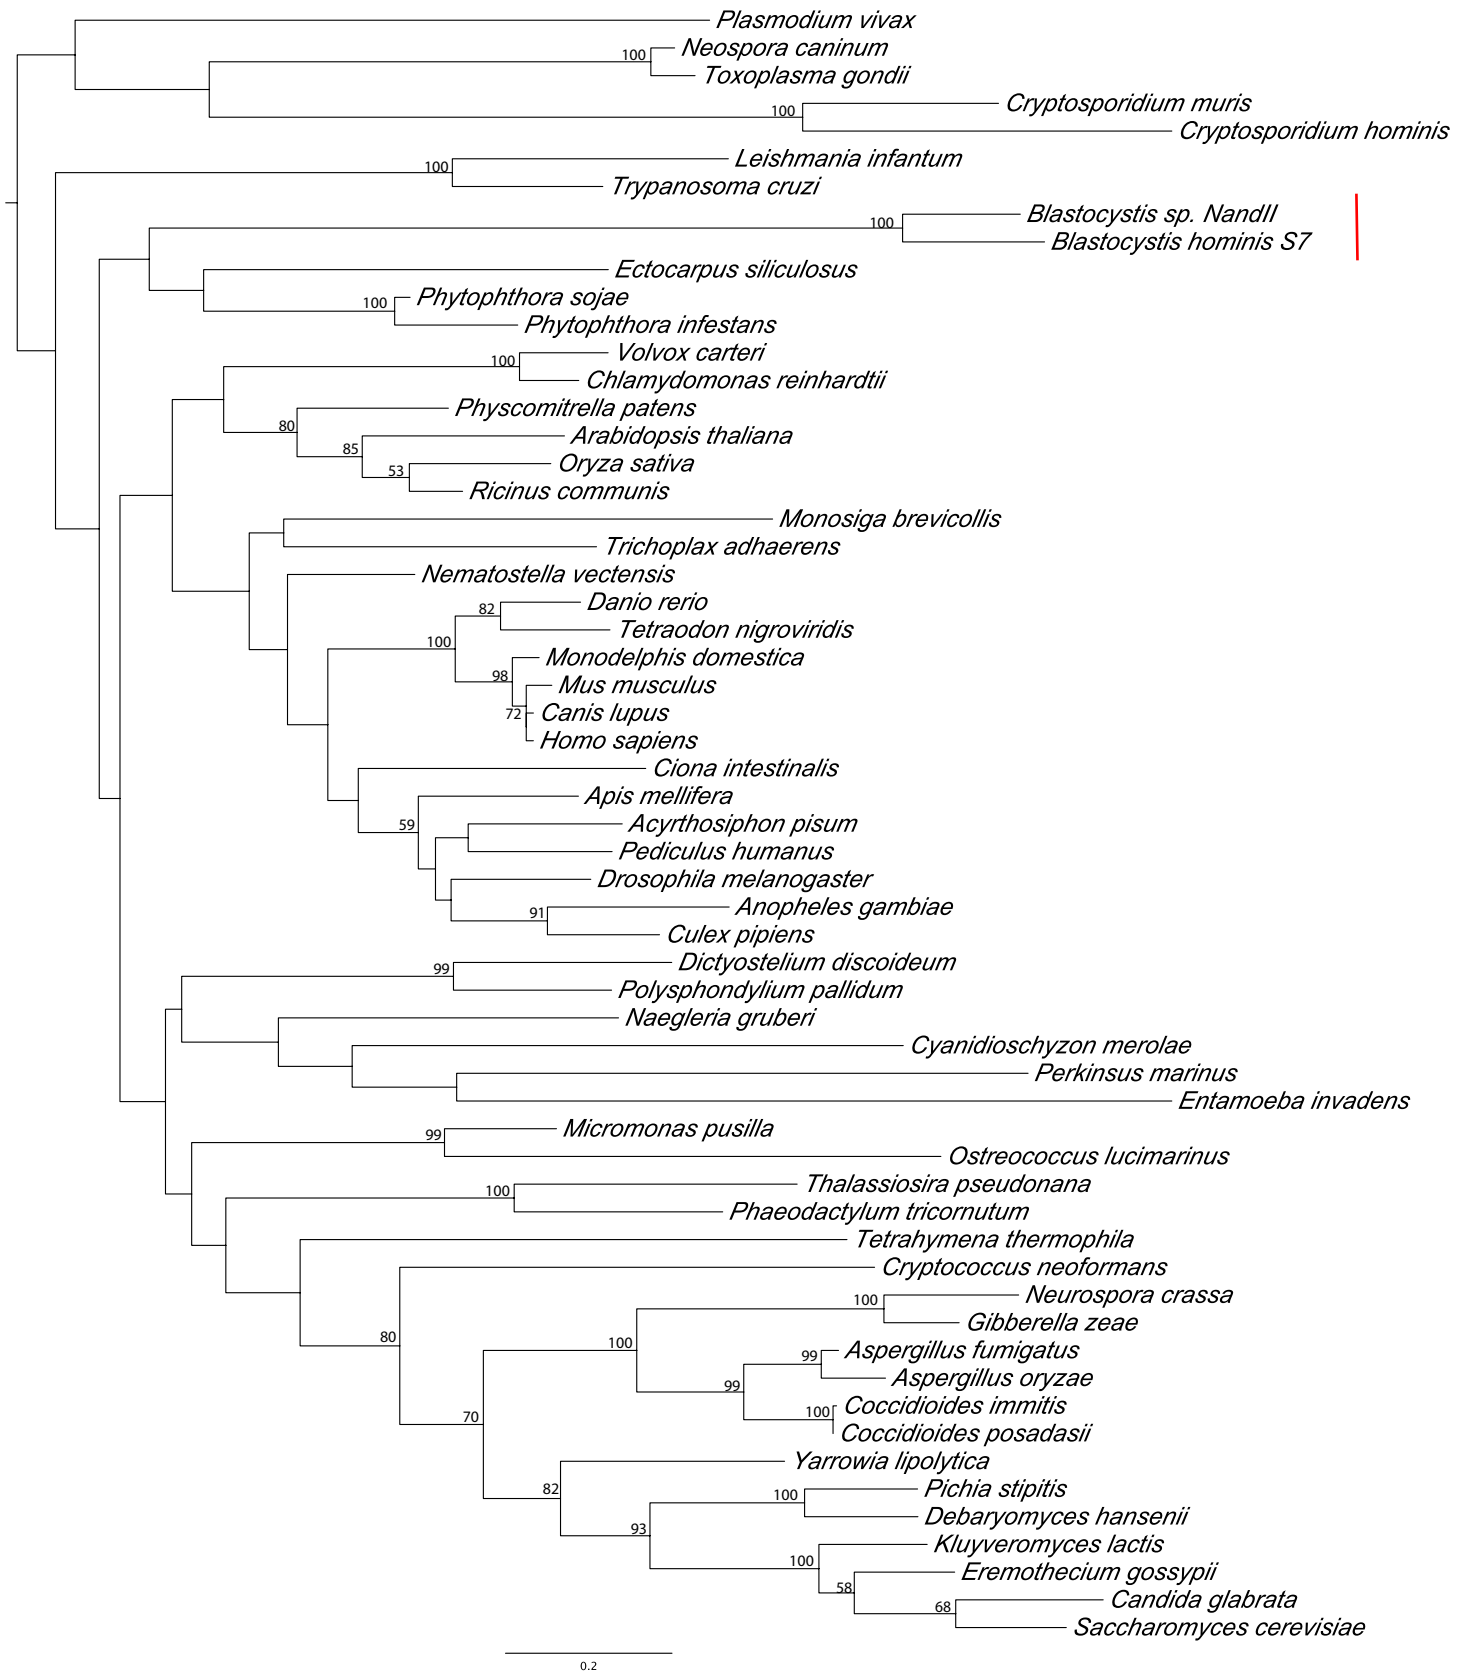

Figure S14

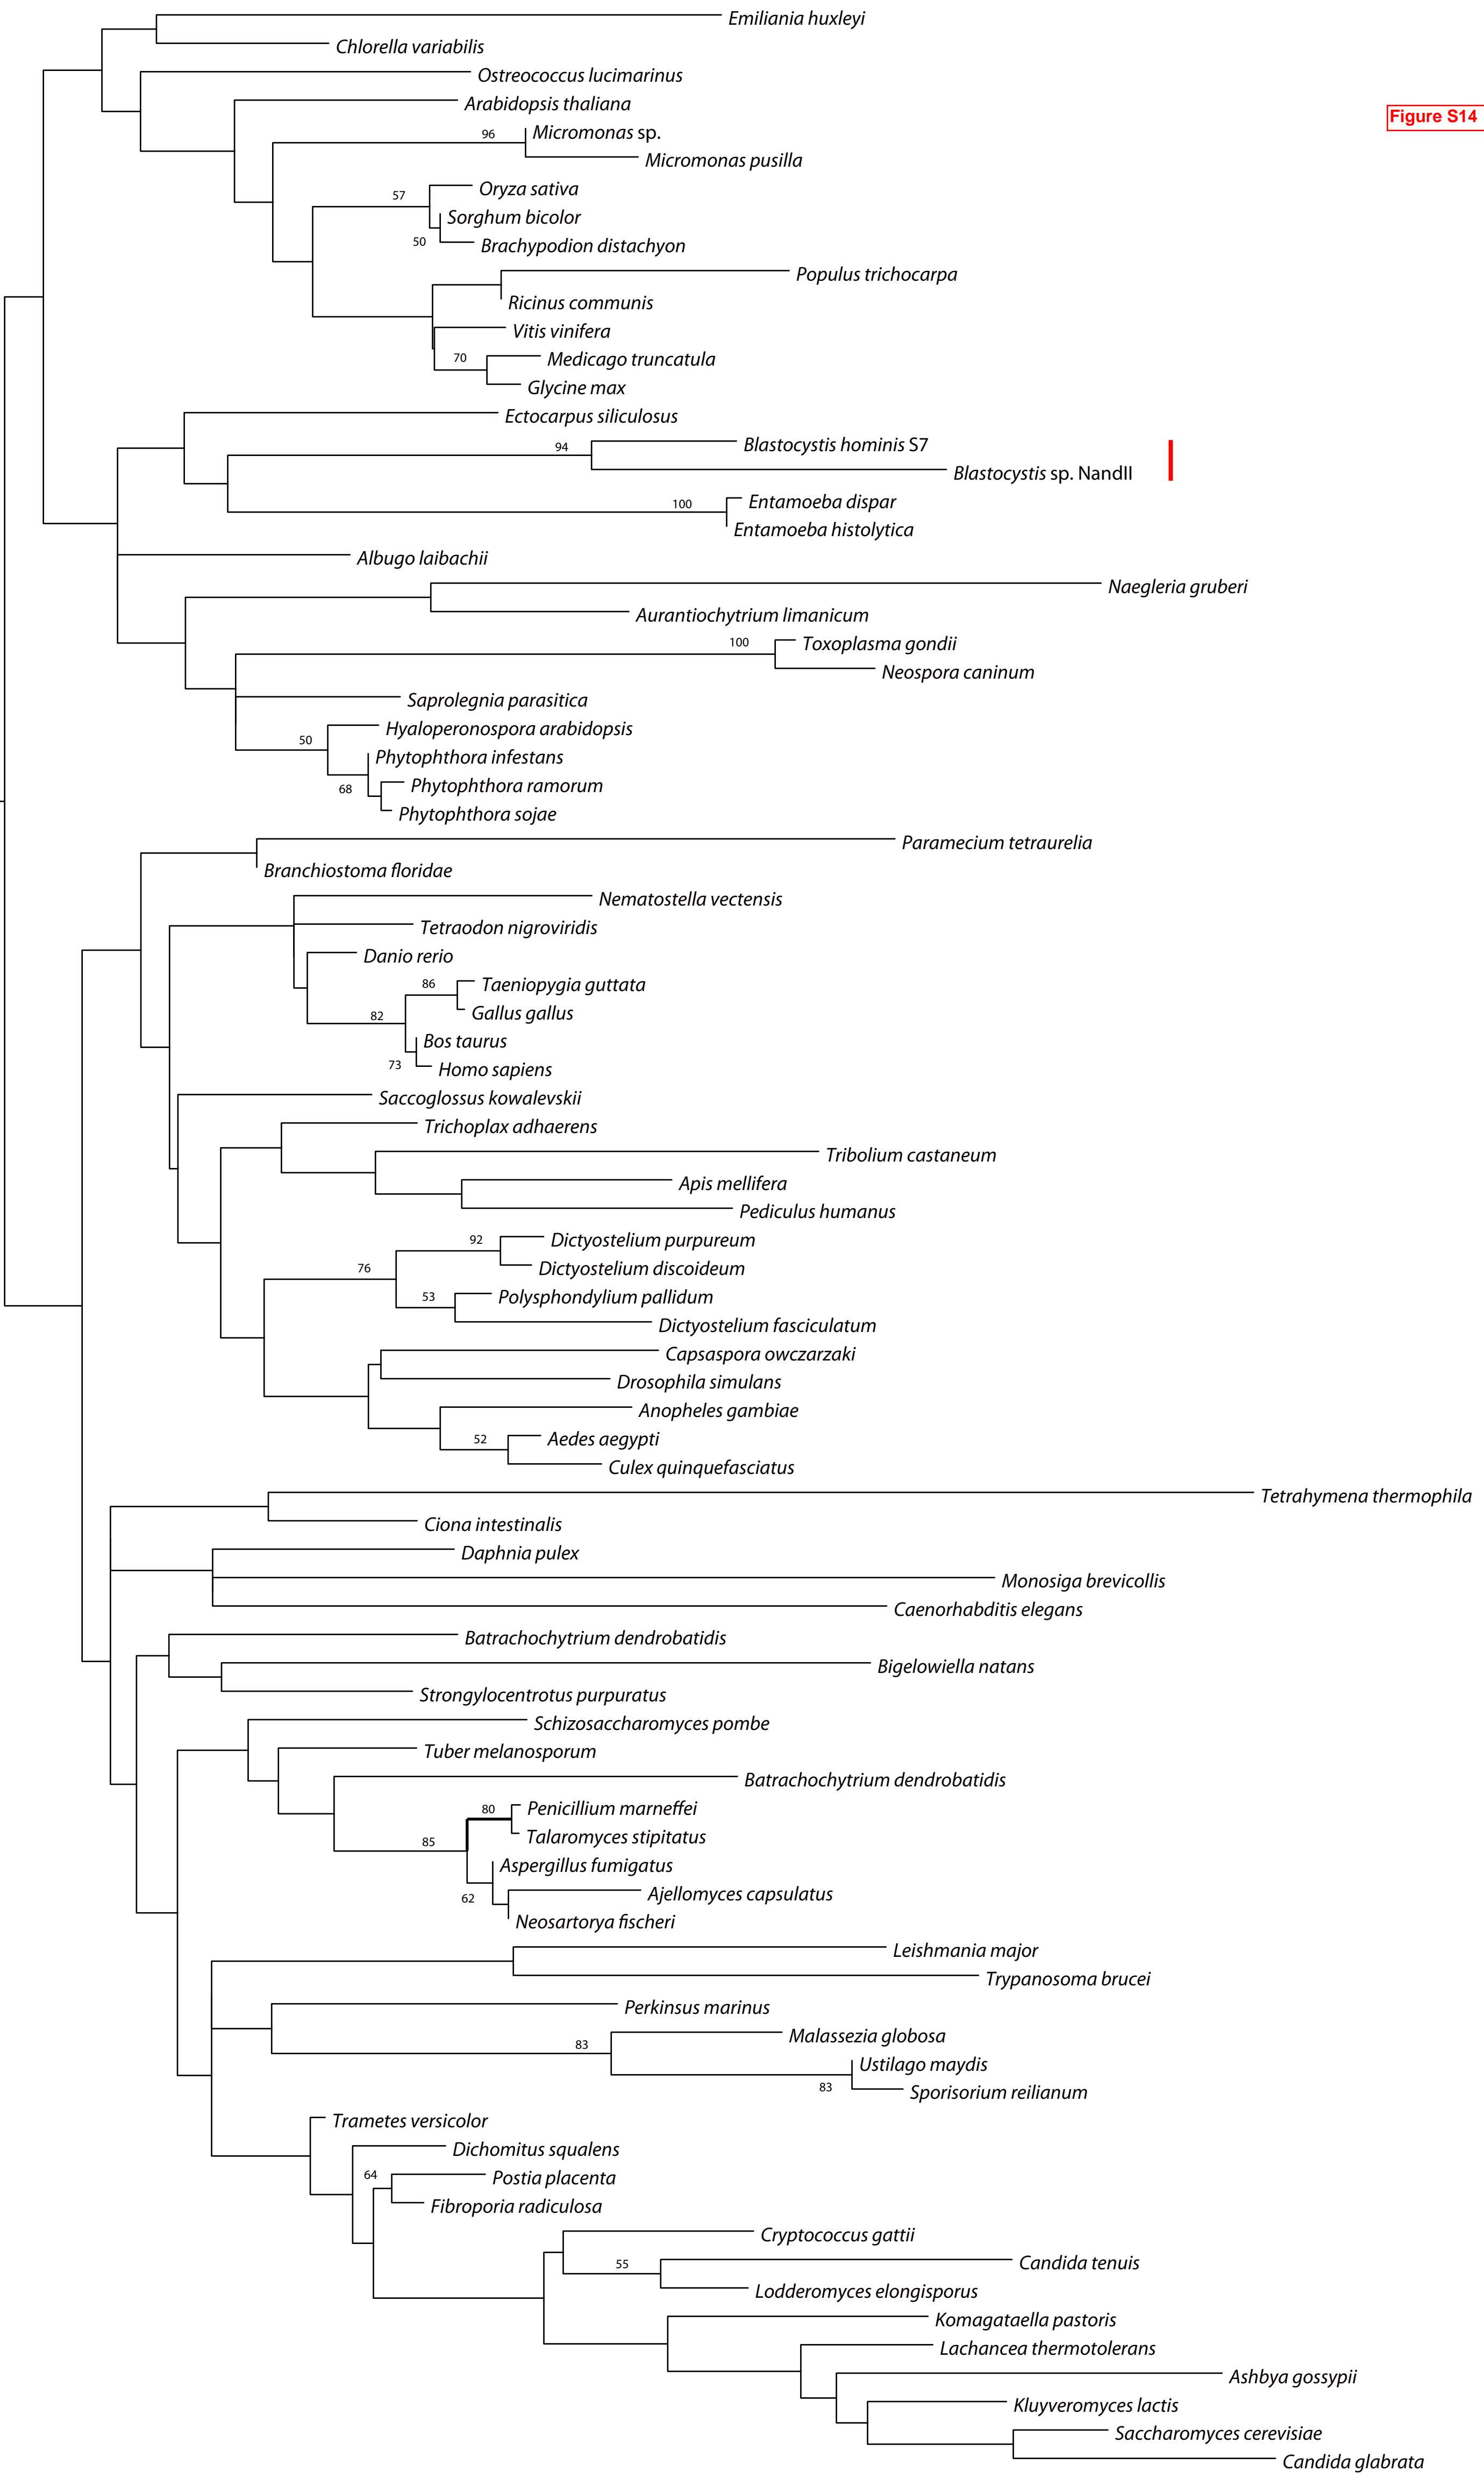



Figure S15

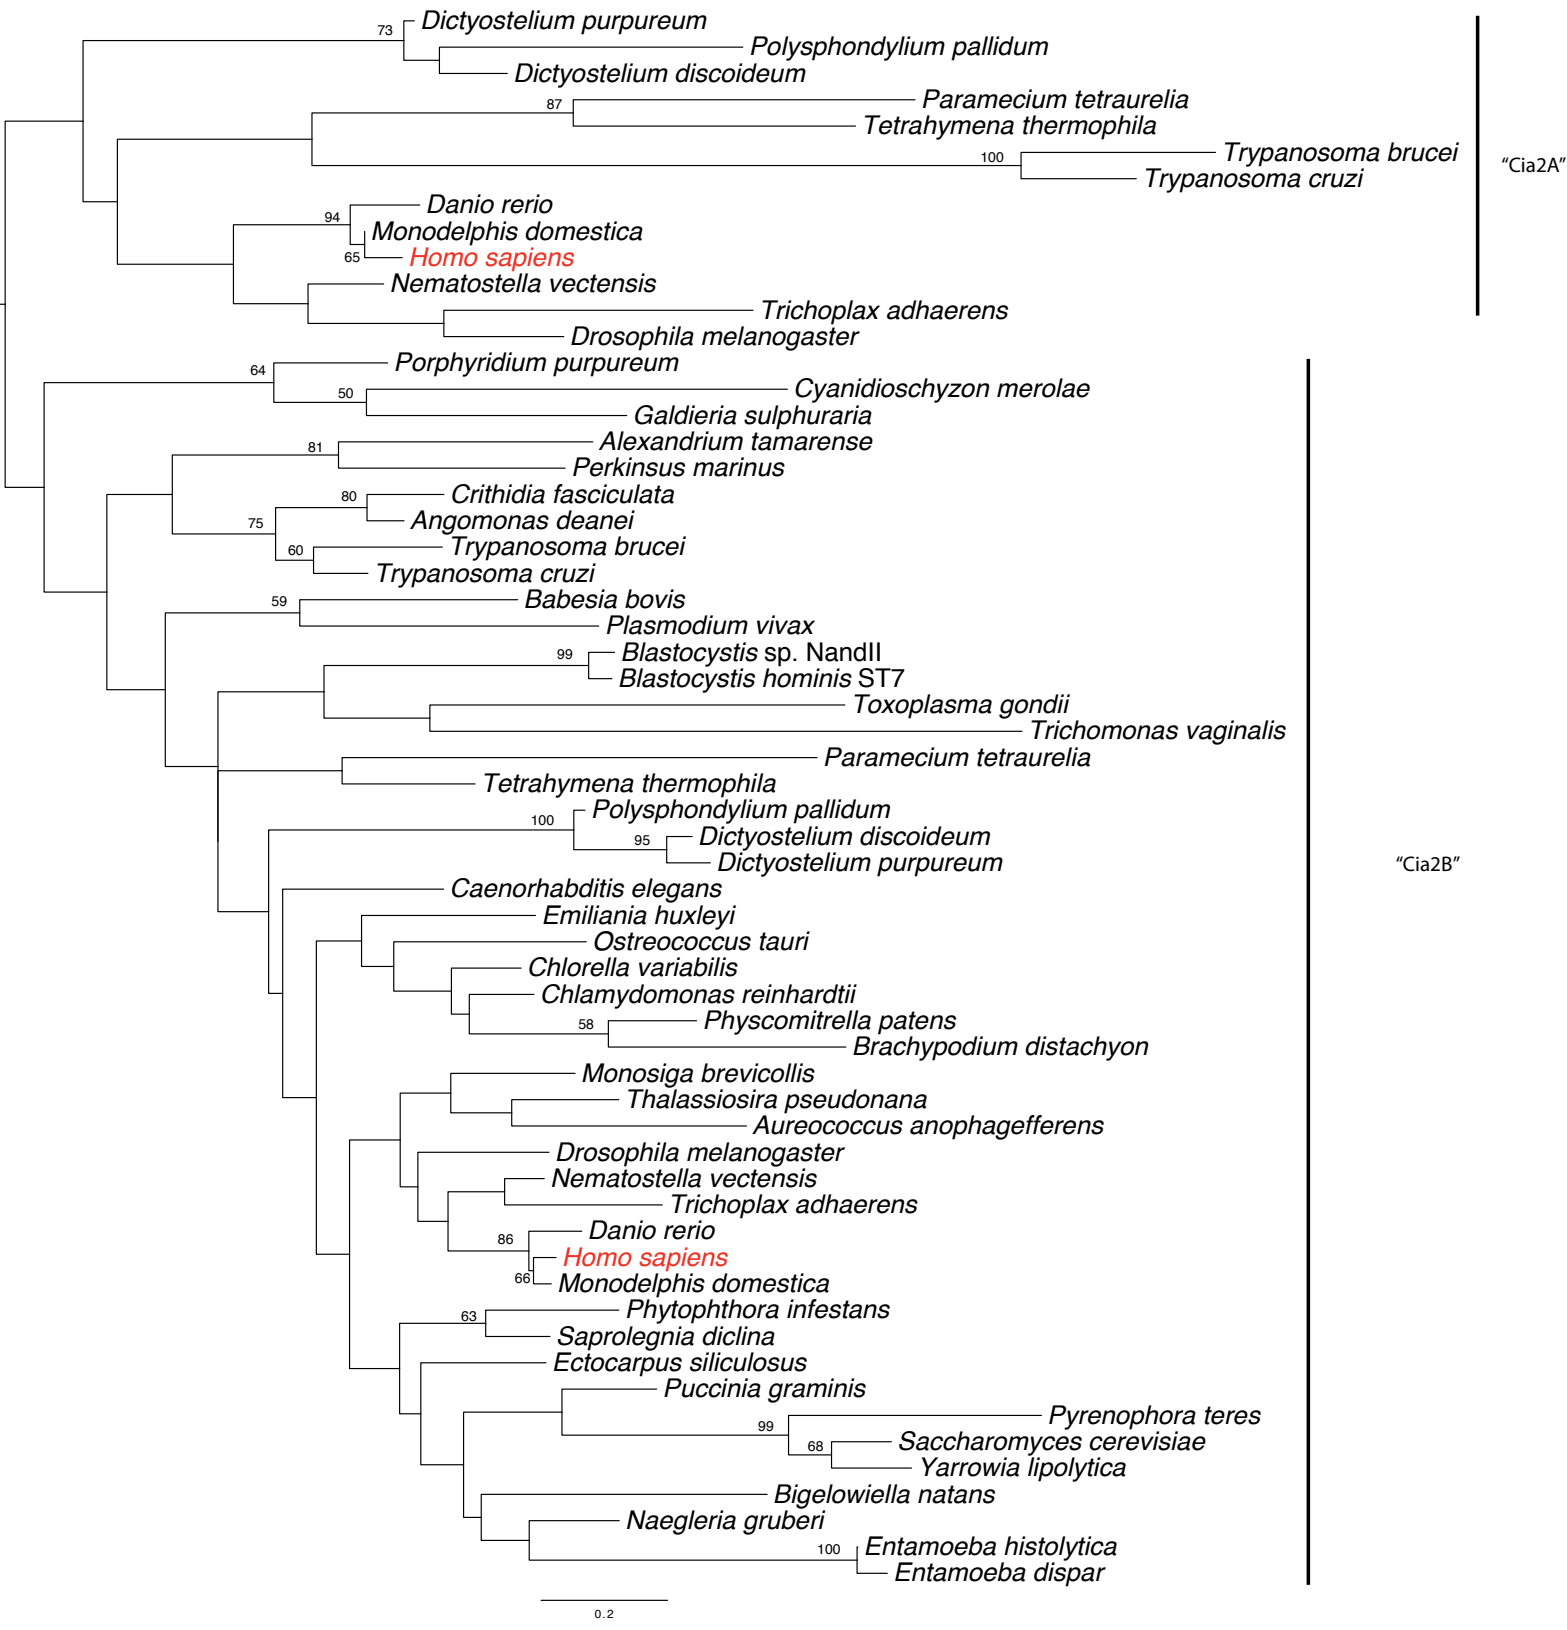

Supplement: EC.00158-13_zek999094215so1.pdf [file EC.00158-13_zek999094215so1.pdf]
